# Supplementary material for: Two-fold addition reaction of silylene to C60: structural and electronic properties of a bis-adduct
Source: publisher site journal article supplement (doi:10.3762/bjoc.20.100), 2024-05-22
Supplement: Additional file 1 [file 1860-5397-20-100-S1.pdf]

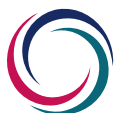

## Supporting Information

for

### **Two-fold addition reaction of silylene to C<sub>60</sub>: structural and electronic properties of a bis-adduct**

Masahiro Kako, Masato Kai, Masanori Yasui, Michio Yamada, Yutaka Maeda  
and Takeshi Akasaka

*Beilstein J. Org. Chem.* **2024**, *20*, 1179–1188. [doi:10.3762/bjoc.20.100](https://doi.org/10.3762/bjoc.20.100)

### **Structural data of 2a and 3<sub>e</sub> obtained by DFT calculations, and Cartesian coordinates of optimized structures**

## Table of contents

|                                                                   |    |
|-------------------------------------------------------------------|----|
| <b>Figure S1.</b> Optimized structure of <b>3e</b> .              | S2 |
| <b>Table S1.</b> Selected bond lengths and angles of <b>3e</b> .  | S2 |
| <b>Table S2.</b> Bond lengths of <b>2a</b> .                      | S3 |
| <b>Table S3.</b> POAV values of <b>2a</b> .                       | S3 |
| <b>Figure S2.</b> The Mulliken charge distribution of <b>2a</b> . | S4 |
| <b>Table S4.</b> Cartesian coordinates of optimized structures.   | S5 |

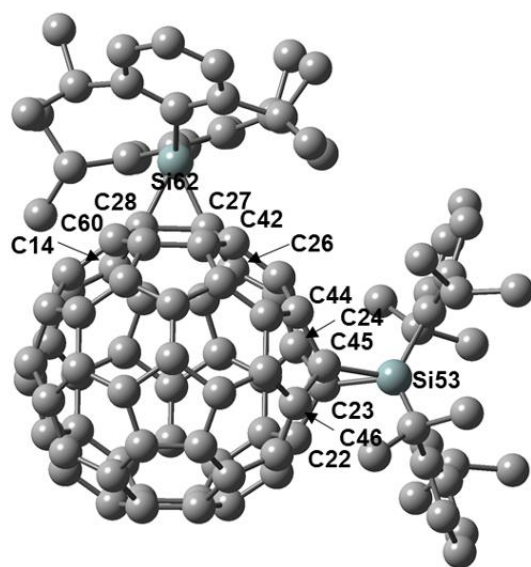

**Figure S1:** Optimized structure of **3e**. Hydrogen atoms are omitted for clarity.

**Table S1.** Selected bond lengths and angles of **3e**.

| bond length/Å |       | bond angle/° |       |
|---------------|-------|--------------|-------|
| C45–C23       | 1.618 | C23–C45–Si53 | 64.94 |
| Si53–C45      | 1.906 | C45–Si53–C23 | 50.19 |
| C23–Si53      | 1.908 | Si53–C23–C45 | 64.86 |
| C45–C46       | 1.500 |              |       |
| C45–C44       | 1.503 |              |       |
| C23–C24       | 1.503 |              |       |
| C23–C22       | 1.502 |              |       |
| C27–C28       | 1.623 | C28–C27–Si62 | 64.56 |
| Si62–C27      | 1.913 | C27–Si62–C28 | 50.33 |
| C28–Si62      | 1.905 | Si62–C28–C27 | 65.10 |
| C42–C27       | 1.499 |              |       |
| C27–C26       | 1.502 |              |       |
| C60–C28       | 1.501 |              |       |
| C28–C14       | 1.499 |              |       |

**Table S2.** Bond lengths<sup>a</sup> of **2a**<sup>b</sup>.

| bond            | bond length/Å |
|-----------------|---------------|
| <i>cis</i> -1   | 1.384         |
| <i>cis</i> -2   | 1.394         |
| <i>cis</i> -3   | 1.401         |
| <i>e</i> '      | 1.395         |
| <i>e</i> ''     | 1.394         |
| <i>trans</i> -4 | 1.396         |
| <i>trans</i> -3 | 1.396         |
| <i>trans</i> -2 | 1.397         |
| <i>trans</i> -1 | 1.396         |

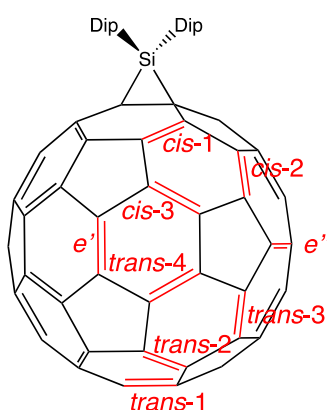

<sup>a</sup>Mean values are given for the identical type of double bonds.

<sup>b</sup>B3LYP/6-31G(d).

**Table S3.** POAV<sup>a</sup> values of **2a**<sup>b</sup>.

| carbon atom | POAV/° | carbon atom | POAV/° |
|-------------|--------|-------------|--------|
| a           | 9.15   | j           | 11.72  |
| b           | 11.58  | k           | 11.67  |
| c           | 10.81  | l           | 11.74  |
| d           | 11.18  | m           | 11.60  |
| e           | 11.83  | n           | 11.65  |
| f           | 11.27  | o           | 11.66  |
| g           | 12.00  | p           | 11.60  |
| h           | 11.65  | q           | 11.60  |
| i           | 11.69  |             |        |

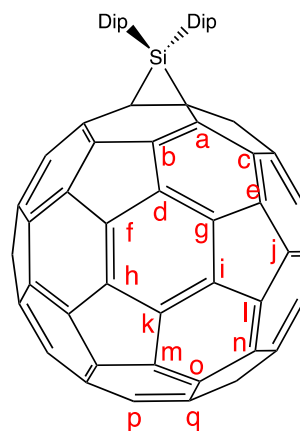

<sup>a</sup>Mean values are given for the identical type of atoms.

<sup>b</sup>B3LYP/6-31G(d).

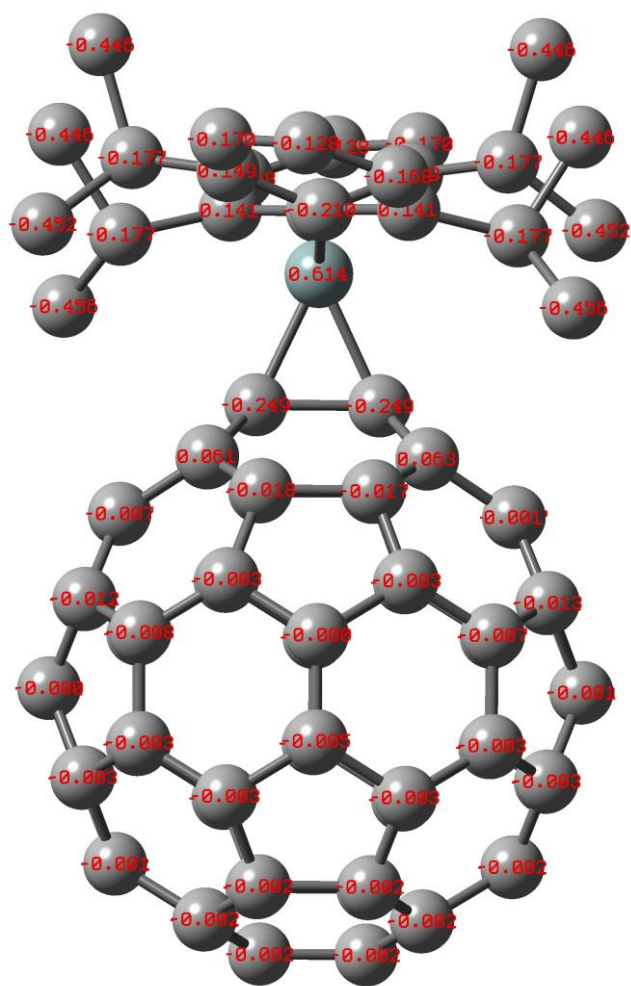

**Figure S2.** The Mulliken charge distribution of **2a**. The hemisphere of the C<sub>60</sub> carbon cage and hydrogen atoms are not shown for clarity.

**Table S4.** Cartesian coordinates of optimized structures.

| 2a |             |             |             |
|----|-------------|-------------|-------------|
| C  | -2.31523200 | 0.85758600  | 3.45395400  |
| C  | -1.14085700 | 0.00476000  | 3.35612800  |
| C  | -0.01568300 | 0.44597200  | 2.64995700  |
| C  | -0.01917700 | 1.75381200  | 2.02754400  |
| C  | -1.14185600 | 2.58210300  | 2.13636300  |
| C  | -2.31561000 | 2.11837700  | 2.85865600  |
| C  | -3.48875900 | 0.00716500  | 3.35698200  |
| C  | -3.03331000 | -1.36526200 | 3.19996900  |
| C  | -1.58158500 | -1.35960300 | 3.20353300  |
| C  | -0.87383400 | -2.21318400 | 2.34735200  |
| C  | 0.74420300  | -0.44937100 | 1.81078800  |
| C  | 0.73337200  | 1.66969000  | 0.80108300  |
| C  | 0.30009700  | 2.37558300  | -0.30818900 |
| C  | -0.87578400 | 3.21163000  | -0.21790600 |
| C  | -1.58177100 | 3.33149300  | 0.98622300  |
| C  | -3.03315300 | 3.33570100  | 0.98067200  |
| C  | -3.48882700 | 2.58524400  | 2.14046900  |
| C  | -4.61678200 | 1.76823800  | 2.04432900  |
| C  | -4.61667200 | 0.45285500  | 2.66504700  |
| C  | -3.72795500 | -2.23528200 | 2.35701500  |
| C  | -4.90171700 | -1.77321100 | 1.64161600  |
| C  | -5.33811500 | -0.45500600 | 1.79083400  |
| C  | -5.78601200 | 0.29768300  | 0.63121000  |
| C  | -5.33822300 | 1.67127700  | 0.78764300  |
| C  | -4.90160800 | 2.39405500  | -0.32490700 |
| C  | -3.72745000 | 3.23918600  | -0.22692800 |
| C  | -2.99550900 | 3.13416700  | -1.47959800 |
| C  | -1.60068700 | 3.11584000  | -1.47215500 |
| C  | 1.43136900  | 0.34332200  | 0.73501300  |
| C  | -1.14089700 | -0.00473400 | -3.35619900 |
| C  | -0.01569700 | -0.44590200 | -2.65004200 |
| C  | -0.01913200 | -1.75374300 | -2.02763200 |
| C  | -1.14178000 | -2.58207700 | -2.13643600 |
| C  | -2.31556200 | -2.11839600 | -2.85871500 |
| C  | -3.48879900 | -0.00723000 | -3.35702700 |
| C  | -3.03340100 | 1.36521400  | -3.20002000 |
| C  | -1.58167600 | 1.35961200  | -3.20360100 |
| C  | -0.87394800 | 2.21321800  | -2.34742700 |
| C  | 0.30557100  | 1.75226300  | -1.64896700 |
| C  | 0.74417100  | 0.44947100  | -1.81088300 |
| C  | 0.73342400  | -1.66958900 | -0.80117900 |
| C  | 0.30019500  | -2.37550500 | 0.30809700  |
| C  | -0.87565600 | -3.21159700 | 0.21782900  |
| C  | -1.58165200 | -3.33148700 | -0.98629100 |
| C  | -3.03303500 | -3.33575000 | -0.98072300 |
| C  | -3.48875100 | -2.58530900 | -2.14051400 |
| C  | -4.61673700 | -1.76834800 | -2.04436000 |
| C  | -4.61668500 | -0.45296500 | -2.66507800 |
| C  | -3.72807000 | 2.23520700  | -2.35705800 |
| C  | -4.90180500 | 1.77309000  | -1.64164400 |
| C  | -5.33815300 | 0.45486800  | -1.79085700 |
| C  | -5.78600700 | -0.29783900 | -0.63122800 |
| C  | -5.33816700 | -1.67141500 | -0.78766600 |
| C  | -4.90151000 | -2.39417600 | 0.32487900  |
| C  | -3.72732100 | -3.23926100 | 0.22688600  |
| C  | -2.99536900 | -3.13421400 | 1.47954700  |
| C  | -1.60054800 | -3.11583400 | 1.47208700  |
| C  | 1.43138000  | -0.34319900 | -0.73512200 |
| C  | 0.30565700  | -1.75218200 | 1.64887700  |
| C  | -2.31523900 | -0.85760500 | -3.45401200 |
| Si | 3.15918500  | 0.00004400  | -0.00000100 |
| C  | 3.99375500  | 1.57497500  | -0.72536500 |
| C  | 4.49415200  | 1.51009400  | -2.05867300 |
| C  | 4.00064100  | 2.84661200  | -0.06773700 |
| C  | 4.89882300  | 2.67546400  | -2.72020900 |
| C  | 4.42620200  | 3.98067200  | -0.77310100 |
| C  | 4.85297700  | 3.91042900  | -2.09161700 |
| H  | 5.25878900  | 2.60968700  | -3.74271800 |

|   |            |             |             |
|---|------------|-------------|-------------|
| H | 4.42693300 | 4.94303100  | -0.27152400 |
| H | 5.16325400 | 4.80959700  | -2.61760900 |
| C | 3.99375400 | -1.57485200 | 0.72538500  |
| C | 4.49378400 | -1.51001500 | 2.05882900  |
| C | 4.00096000 | -2.84643600 | 0.06765300  |
| C | 4.89862500 | -2.67535600 | 2.72031100  |
| C | 4.42670100 | -3.98046000 | 0.77297000  |
| C | 4.85326900 | -3.91025300 | 2.09155400  |
| H | 5.25840900 | -2.60959100 | 3.74288700  |
| H | 4.42768000 | -4.94278000 | 0.27131500  |
| H | 5.16371700 | -4.80939500 | 2.61749100  |
| C | 3.66835100 | 3.08468700  | 1.40743100  |
| H | 3.17329200 | 2.19532000  | 1.80493700  |
| C | 4.97437500 | 3.30773600  | 2.20173300  |
| H | 5.45081200 | 4.24713400  | 1.89852000  |
| H | 4.76699600 | 3.37069500  | 3.27697800  |
| H | 5.69822300 | 2.50607700  | 2.03508200  |
| C | 2.72214500 | 4.27860000  | 1.65465200  |
| H | 1.83993800 | 4.24383700  | 1.01245300  |
| H | 2.38563200 | 4.27364700  | 2.69759200  |
| H | 3.22722400 | 5.23609200  | 1.48487800  |
| C | 4.65828100 | 0.20534000  | -2.82962500 |
| H | 4.35117600 | -0.61524600 | -2.17402800 |
| C | 6.13852400 | -0.03846900 | -3.18906200 |
| H | 6.25528900 | -0.99221800 | -3.71427700 |
| H | 6.52343000 | 0.74853500  | -3.84656700 |
| H | 6.76837400 | -0.05966700 | -2.29280200 |
| C | 3.77175900 | 0.14149600  | -4.08755900 |
| H | 3.87087600 | -0.83552400 | -4.57530800 |
| H | 2.71671100 | 0.29719100  | -3.84374300 |
| H | 4.06262100 | 0.90575200  | -4.81745900 |
| C | 3.66852300 | -3.08460300 | -1.40746800 |
| H | 3.17344300 | -2.19526000 | -1.80500400 |
| C | 4.97440900 | -3.30785300 | -2.20194100 |
| H | 4.76687300 | -3.37069500 | -3.27716100 |
| H | 5.69845200 | -2.50635200 | -2.03534400 |
| H | 5.45070600 | -4.24736800 | -1.89887400 |
| C | 2.72219300 | -4.27848600 | -1.65438000 |
| H | 1.83998400 | -4.24343200 | -1.01220100 |
| H | 2.38569600 | -4.27379300 | -2.69732700 |
| H | 3.22716300 | -5.23598200 | -1.48430500 |
| C | 4.65753100 | -0.20535100 | 2.83000600  |
| H | 4.35008200 | 0.61532400  | 2.17466600  |
| C | 6.13772600 | 0.03866700  | 3.18946400  |
| H | 6.76764300 | 0.05970300  | 2.29324700  |
| H | 6.25440600 | 0.99251800  | 3.71450300  |
| H | 6.52260300 | -0.74820600 | 3.84715500  |
| C | 3.77103000 | -0.14202500 | 4.08798900  |
| H | 3.86974600 | 0.83499100  | 4.57582500  |
| H | 2.71603800 | -0.29811800 | 3.84415400  |
| H | 4.06222100 | -0.90621800 | 4.81782000  |

## 2c

|   |             |             |             |
|---|-------------|-------------|-------------|
| C | 1.86230714  | 0.93924806  | -3.40165922 |
| C | 0.50114605  | 0.97606707  | -2.90089818 |
| C | 0.13195503  | 1.94278214  | -1.98093312 |
| C | 1.08813711  | 2.93646520  | -1.54709809 |
| C | 2.39763720  | 2.91799419  | -2.03607113 |
| C | 2.79488022  | 1.89486411  | -2.98430119 |
| C | 2.25725717  | -0.45230905 | -3.51919323 |
| C | 1.14188408  | -1.27520210 | -3.08167420 |
| C | 0.04896301  | -0.40895403 | -2.70107217 |
| C | -0.78101506 | -0.72904805 | -1.63658910 |
| C | -0.74970504 | 1.61824613  | -0.86280504 |
| C | 0.82818909  | 3.17444322  | -0.14601699 |
| C | 1.88854017  | 3.40652623  | 0.71632007  |
| C | 3.25075927  | 3.39115222  | 0.22218004  |
| C | 3.50513728  | 3.15037620  | -1.13231906 |
| C | 4.59483735  | 2.26944813  | -1.51796609 |
| C | 4.15416332  | 1.48931807  | -2.66564817 |

|    |             |             |             |
|----|-------------|-------------|-------------|
| C  | 4.53301433  | 0.15316098  | -2.78749818 |
| C  | 3.56516126  | -0.83902009 | -3.22552821 |
| C  | 1.37755008  | -2.46053319 | -2.38530015 |
| C  | 2.73828218  | -2.86323623 | -2.07913213 |
| C  | 3.81082326  | -2.06749118 | -2.48614715 |
| C  | 4.92529335  | -1.83226617 | -1.58658209 |
| C  | 5.36967537  | -0.46365308 | -1.76815510 |
| C  | 5.79183245  | 0.28508397  | -0.66755403 |
| C  | 5.39365742  | 1.67853108  | -0.53983702 |
| C  | 5.14127639  | 1.94395910  | 0.86727309  |
| C  | 4.08887532  | 2.78110717  | 1.24061211  |
| C  | -0.31745000 | 2.33970017  | 0.25628404  |
| C  | 2.39192018  | 0.43516901  | 3.52801827  |
| C  | 1.08148709  | 0.81358205  | 3.21731525  |
| C  | 0.12207601  | -0.17107301 | 2.76726022  |
| C  | 0.49823403  | -1.49915111 | 2.65395621  |
| C  | 1.85784512  | -1.90033215 | 2.96359923  |
| C  | 4.15009929  | -0.98883610 | 2.88561123  |
| C  | 4.59120034  | 0.38589999  | 2.70093622  |
| C  | 3.50092927  | 1.26145507  | 3.09878825  |
| C  | 3.24803626  | 2.43036615  | 2.37358519  |
| C  | 1.88619916  | 2.80911919  | 2.05503317  |
| C  | 0.82236008  | 2.01601514  | 2.46023720  |
| C  | -0.76627805 | 0.44664604  | 1.78210815  |
| C  | -1.45615610 | -0.37387001 | 0.77260408  |
| C  | -0.76809906 | -1.68739711 | 0.53288806  |
| C  | 0.05507399  | -2.26738416 | 1.48413013  |
| C  | 1.14184806  | -3.13565124 | 1.09741710  |
| C  | 2.25408014  | -2.91700623 | 2.00604416  |
| C  | 3.56206124  | -2.95909724 | 1.52386013  |
| C  | 4.52971831  | -1.97144318 | 1.97199516  |
| C  | 5.39189441  | 0.71893301  | 1.60908614  |
| C  | 5.79095941  | -0.30627807 | 0.65699107  |
| C  | 5.36799836  | -1.62533716 | 0.83337108  |
| C  | 4.92433634  | -2.40315621 | -0.30785900 |
| C  | 3.80868126  | -3.22897926 | 0.11558603  |
| C  | 2.73735617  | -3.45559927 | -0.75103103 |
| C  | 1.37640507  | -3.41164025 | -0.24932400 |
| C  | 0.54237202  | -2.78261720 | -1.24988207 |
| C  | -0.50505605 | -1.92122413 | -0.86792004 |
| C  | -0.32664200 | 1.75990513  | 1.57284514  |
| C  | -1.45678110 | 0.33316604  | -0.80840604 |
| C  | 2.78996220  | -0.95372609 | 3.39907327  |
| Si | -3.15179122 | 0.00282003  | -0.00963598 |
| C  | -3.95485227 | 1.56191814  | 0.77789308  |
| C  | -4.44322430 | 1.43555414  | 2.11151117  |
| C  | -3.94519425 | 2.86587824  | 0.18861004  |
| C  | -4.81533632 | 2.57184322  | 2.83939423  |
| C  | -4.33542727 | 3.96959332  | 0.95945609  |
| C  | -4.74678630 | 3.83784632  | 2.27817718  |
| H  | -5.16902935 | 2.45849822  | 3.85997730  |
| H  | -4.32155327 | 4.95712440  | 0.50966206  |
| H  | -5.03002532 | 4.71395938  | 2.85584423  |
| C  | -4.07043430 | -1.52024608 | -0.75226603 |
| C  | -4.64342234 | -1.37617106 | -2.05153312 |
| C  | -4.13084832 | -2.80972017 | -0.13467299 |
| C  | -5.19697339 | -2.48155613 | -2.70775917 |
| C  | -4.71651036 | -3.87782024 | -0.82974104 |
| C  | -5.23372240 | -3.73081122 | -2.10773413 |
| H  | -5.60761140 | -2.35784612 | -3.70519825 |
| H  | -4.76280438 | -4.85221831 | -0.35400700 |
| H  | -5.66758041 | -4.58113428 | -2.62750817 |
| C  | -3.63890523 | 3.17102926  | -1.27925707 |
| H  | -3.16216620 | 2.29643320  | -1.72857211 |
| C  | -4.95987832 | 3.44644929  | -2.03143312 |
| H  | -5.41403233 | 4.37855236  | -1.67595610 |
| H  | -4.77758831 | 3.55343230  | -3.10779020 |
| H  | -5.69160538 | 2.64904124  | -1.88138911 |
| C  | -2.68656815 | 4.36623434  | -1.49160908 |
| H  | -1.79475809 | 4.29722533  | -0.86616904 |



|   |             |             |             |
|---|-------------|-------------|-------------|
| H | -2.36707313 | 4.40259334  | -2.53939216 |
| H | -3.18057718 | 5.31993239  | -1.27412307 |
| C | -2.67300022 | -4.36096229 | 1.28636112  |
| H | -1.87708016 | -4.25716029 | 0.54584406  |
| H | -2.20802819 | -4.45741830 | 2.27381419  |
| H | -3.20111827 | -5.29911837 | 1.08217810  |
| C | -4.69958033 | -0.05258396 | -2.80715518 |
| H | -4.34709630 | 0.73662909  | -2.13630913 |
| C | -6.14381041 | 0.31166907  | -3.20644621 |
| H | -6.80098447 | 0.35912008  | -2.33104514 |
| H | -6.16852442 | 1.28447314  | -3.70783724 |
| H | -6.56686846 | -0.42289997 | -3.89978326 |
| C | -3.77546727 | -0.05097497 | -4.04033927 |
| H | -3.78639526 | 0.93195810  | -4.52631930 |
| H | -2.74245519 | -0.28838300 | -3.76923225 |
| H | -4.10510330 | -0.79068602 | -4.77932332 |
| C | -4.63964233 | 0.09374505  | 2.80918522  |
| H | -4.34077831 | -0.69816101 | 2.11485317  |
| C | -3.64019928 | -3.15709720 | 1.27349111  |
| H | -3.09976024 | -2.30053014 | 1.68268714  |
| C | -6.13047842 | -0.13537396 | 3.13430925  |
| H | -6.27579843 | -1.10584203 | 3.62068928  |
| H | -6.51105646 | 0.63311510  | 3.81580630  |
| H | -6.74447146 | -0.10889895 | 2.22733118  |
| C | -3.77195726 | -0.05684897 | 4.07261331  |
| H | -4.05529028 | 0.67309408  | 4.83956637  |
| H | -3.89951728 | -1.05608304 | 4.50553635  |
| H | -2.71072219 | 0.08735703  | 3.84945930  |
| C | -4.83241737 | -3.46093721 | 2.20624018  |
| H | -4.48680035 | -3.59864722 | 3.23795026  |
| H | -5.57631544 | -2.66091214 | 2.19501418  |
| H | -5.33965239 | -4.38332927 | 1.90122216  |

### 3cis-2

|   |             |             |             |
|---|-------------|-------------|-------------|
| C | 0.69882500  | -3.19204400 | -0.54831900 |
| C | 1.70315100  | -3.78930000 | 0.29401000  |
| C | 2.99633500  | -4.03375900 | -0.18145300 |
| C | 3.34064700  | -3.63936800 | -1.52631100 |
| C | 2.37168400  | -3.01417200 | -2.32279900 |
| C | 1.03369100  | -2.79221900 | -1.82313100 |
| C | -0.31571600 | -2.48199600 | 0.29925200  |
| C | 0.38229500  | -2.39707500 | 1.62173900  |
| C | 1.50461300  | -3.29486200 | 1.63968800  |
| C | 2.60810300  | -3.07070500 | 2.47422800  |
| C | 4.14159400  | -3.78439300 | 0.67833300  |
| C | 4.70170400  | -3.13756500 | -1.50946000 |
| C | 5.05266900  | -2.04356900 | -2.30464300 |
| C | 4.05236000  | -1.40551400 | -3.14098900 |
| C | 2.73916900  | -1.87534600 | -3.14175800 |
| C | 1.62683000  | -0.94218700 | -3.13393100 |
| C | 0.57768900  | -1.47810800 | -2.31848000 |
| C | -0.21519200 | -0.63202400 | -1.54604000 |
| C | -0.86968600 | -1.06497000 | -0.26289100 |
| C | 0.43455400  | -1.24177300 | 2.37919200  |
| C | -0.05046200 | 0.04490300  | 1.85271200  |
| C | -0.61344700 | 0.14456600  | 0.61709900  |
| C | -0.44753600 | 1.38762800  | -0.23340700 |
| C | 0.01647200  | 0.78392700  | -1.54371300 |
| C | 1.06070100  | 1.30002300  | -2.31307200 |
| C | 1.86747500  | 0.43658500  | -3.12998400 |
| C | 5.20056100  | -3.23052000 | -0.14587500 |
| C | 6.09396800  | -0.31775300 | 1.73119400  |
| C | 5.31635700  | 0.52630300  | 2.53000500  |
| C | 4.22224000  | 2.82834900  | -0.14035300 |
| C | 5.83902300  | -1.74611200 | 1.72302400  |
| C | 4.81652800  | -2.27617700 | 2.51467200  |
| C | 4.00458600  | -1.39763600 | 3.33568400  |
| C | 4.24912800  | -0.02332900 | 3.34410000  |
| C | 3.13848500  | 0.91623300  | 3.31823500  |
| C | 3.52089500  | 2.04208400  | 2.50719900  |

|    |             |             |             |
|----|-------------|-------------|-------------|
| C  | 2.56130200  | 2.64933700  | 1.68408100  |
| C  | 2.92446900  | 3.04046200  | 0.33810200  |
| C  | 1.95853300  | 2.34122200  | -1.78216700 |
| C  | 1.77963500  | 2.82288400  | -0.50559900 |
| C  | 0.57705100  | 2.52745300  | 0.33065100  |
| C  | 1.18954700  | 2.20948600  | 1.66630900  |
| C  | 0.83913500  | 1.09083000  | 2.40341600  |
| C  | 1.82264300  | 0.44223500  | 3.23963600  |
| C  | 1.57172300  | -0.98583500 | 3.22712700  |
| C  | 2.63793900  | -1.89090500 | 3.29889900  |
| C  | 6.03144700  | -2.23036300 | 0.36540200  |
| C  | 3.94971900  | -3.31496800 | 1.97898400  |
| Si | -1.20004400 | 3.16304500  | 0.08448500  |
| C  | 5.91979400  | -1.00619200 | -1.77390500 |
| C  | 6.40271400  | -1.09885200 | -0.46472200 |
| C  | 6.01397200  | 1.31383400  | -0.12000500 |
| C  | 6.44546900  | 0.08262600  | 0.37841300  |
| C  | 5.21078700  | 2.19208400  | 0.71274100  |
| C  | 4.86442300  | 1.80726400  | 2.00868900  |
| C  | 5.46486500  | 0.27225500  | -2.29116200 |
| C  | 5.51495800  | 1.41149500  | -1.48297000 |
| C  | 3.23672800  | 0.92171200  | -3.12549500 |
| C  | 4.30696000  | 0.02716800  | -3.13246300 |
| C  | 3.28719000  | 2.10157200  | -2.28716200 |
| C  | 4.41050100  | 2.35053100  | -1.48868800 |
| Si | -2.16765200 | -2.52096600 | -0.15230500 |
| C  | -1.81599300 | 4.27597900  | -1.38529200 |
| C  | -1.04022000 | 5.18294700  | -2.17693300 |
| C  | -3.22680400 | 4.26151800  | -1.60285100 |
| C  | -1.67907200 | 6.01506600  | -3.10710000 |
| C  | -3.81255500 | 5.11221600  | -2.54963600 |
| C  | -3.05114300 | 5.99238900  | -3.30037400 |
| H  | -1.07613300 | 6.69596900  | -3.69957200 |
| H  | -4.88778800 | 5.08239000  | -2.69660100 |
| H  | -3.51917000 | 6.64967000  | -4.02864900 |
| C  | -1.98531900 | 3.69876100  | 1.76655200  |
| C  | -2.86161600 | 2.93971400  | 2.59631700  |
| C  | -1.66015300 | 5.02766900  | 2.18068500  |
| C  | -3.40281000 | 3.52515300  | 3.75084200  |
| C  | -2.21526300 | 5.55685800  | 3.35231300  |
| C  | -3.09318900 | 4.82079200  | 4.13308500  |
| H  | -4.07402900 | 2.94091700  | 4.37251300  |
| H  | -1.95146000 | 6.56520100  | 3.65669400  |
| H  | -3.52256600 | 5.24798500  | 5.03569500  |
| C  | -3.53722200 | -2.78397600 | 1.20191100  |
| C  | -4.89105000 | -2.46248000 | 0.86338900  |
| C  | -3.30217500 | -3.33732400 | 2.50498900  |
| C  | -5.91345700 | -2.60442200 | 1.80982000  |
| C  | -4.36303000 | -3.43353000 | 3.41912700  |
| C  | -5.65574500 | -3.05919900 | 3.09400700  |
| H  | -6.93276500 | -2.35975500 | 1.53107700  |
| H  | -4.16510600 | -3.83596900 | 4.40744200  |
| H  | -6.45790300 | -3.14695600 | 3.82220900  |
| C  | -2.43430200 | -3.42194000 | -1.83600700 |
| C  | -2.32542200 | -4.84571000 | -1.80495400 |
| C  | -2.69468000 | -2.79427600 | -3.09637500 |
| C  | -2.43721000 | -5.58867700 | -2.98655600 |
| C  | -2.78890600 | -3.58878100 | -4.24850100 |
| C  | -2.65668100 | -4.96897900 | -4.20741800 |
| H  | -2.35007900 | -6.67043400 | -2.94630600 |
| H  | -2.97483900 | -3.10887400 | -5.20432700 |
| H  | -2.73252100 | -5.55614200 | -5.11903700 |
| C  | -4.20359800 | 3.35873300  | -0.85492300 |
| H  | -3.64340200 | 2.72908600  | -0.15389200 |
| C  | 0.48166900  | 5.31455900  | -2.15656100 |
| H  | 0.87542300  | 4.68111400  | -1.36437000 |
| C  | 0.98734600  | 6.74307300  | -1.87237500 |
| H  | 2.08310400  | 6.74302200  | -1.83821600 |
| H  | 0.68561800  | 7.45076800  | -2.65260400 |
| H  | 0.62242300  | 7.12609700  | -0.91691700 |

|   |             |             |             |
|---|-------------|-------------|-------------|
| C | 1.07403200  | 4.82326500  | -3.49459600 |
| H | 2.16814700  | 4.80554200  | -3.44813700 |
| H | 0.72716000  | 3.81722100  | -3.74666600 |
| H | 0.78488200  | 5.49032600  | -4.31521700 |
| C | -5.20747800 | 4.19128400  | -0.03209500 |
| H | -4.69305200 | 4.80867400  | 0.71060600  |
| H | -5.79099100 | 4.85561600  | -0.67857100 |
| H | -5.91623500 | 3.54485200  | 0.49569700  |
| C | -4.92595200 | 2.40236700  | -1.82101900 |
| H | -4.20759100 | 1.79216800  | -2.37830500 |
| H | -5.59248000 | 1.73120900  | -1.27165300 |
| H | -5.53503800 | 2.94877200  | -2.54949800 |
| C | -0.70548900 | 5.95698200  | 1.43011700  |
| H | -0.36203600 | 5.45635800  | 0.52032600  |
| C | -1.41822100 | 7.25238100  | 0.99275800  |
| H | -0.72906700 | 7.91916900  | 0.46404100  |
| H | -2.25867900 | 7.03469600  | 0.32575100  |
| H | -1.80628200 | 7.80544600  | 1.85476100  |
| C | 0.55744200  | 6.26038800  | 2.26120300  |
| H | 1.07367400  | 5.33835700  | 2.54793600  |
| H | 1.25598700  | 6.87657000  | 1.68284700  |
| H | 0.31316400  | 6.80734800  | 3.17889800  |
| C | -3.24415700 | 1.47560400  | 2.38000000  |
| H | -2.75372400 | 1.11069500  | 1.47229800  |
| C | -2.75353000 | 0.61148400  | 3.56122900  |
| H | -2.90439700 | -0.44980900 | 3.34075700  |
| H | -1.69470400 | 0.77722800  | 3.77348800  |
| H | -3.31638300 | 0.84182600  | 4.47316500  |
| C | -4.76128600 | 1.26463400  | 2.21539900  |
| H | -5.15399900 | 1.77168300  | 1.33154000  |
| H | -4.97991200 | 0.19616200  | 2.12456200  |
| H | -5.31478400 | 1.63948500  | 3.08364400  |
| C | -2.92894000 | -1.29507100 | -3.33527700 |
| H | -2.76167200 | -0.75719700 | -2.39577100 |
| C | -1.98811800 | -3.93259100 | 3.01716800  |
| H | -1.22657200 | -3.81569400 | 2.25075100  |
| C | -1.47835200 | -3.23571000 | 4.29450500  |
| H | -0.48547400 | -3.61679700 | 4.55872000  |
| H | -1.39893000 | -2.15379500 | 4.16647600  |
| H | -2.14112500 | -3.42751800 | 5.14612400  |
| C | -2.11960200 | -5.44803900 | 3.28417700  |
| H | -2.81168000 | -5.65449400 | 4.10841600  |
| H | -2.48189300 | -5.98788500 | 2.40585700  |
| H | -1.14279900 | -5.86222200 | 3.56076100  |
| C | -4.37454800 | -1.01380700 | -3.80457300 |
| H | -4.56797600 | -1.49793700 | -4.76823500 |
| H | -5.12774300 | -1.37129900 | -3.10304200 |
| H | -4.52218000 | 0.06319200  | -3.94390900 |
| C | -1.98320500 | -0.69873200 | -4.40374400 |
| H | -2.03672000 | 0.39572300  | -4.37963000 |
| H | -0.94466900 | -0.99247400 | -4.25584100 |
| H | -2.28149300 | -1.01503900 | -5.40997700 |
| C | -5.34434000 | -2.06461900 | -0.53900300 |
| H | -4.46998600 | -1.71640800 | -1.09785600 |
| C | -5.92501200 | -3.29764300 | -1.26566000 |
| H | -5.18731800 | -4.09835900 | -1.35830300 |
| H | -6.78671100 | -3.68873400 | -0.71204500 |
| H | -6.26662600 | -3.03651500 | -2.27349700 |
| C | -6.37658100 | -0.92139500 | -0.55979800 |
| H | -6.53735200 | -0.57943900 | -1.58734800 |
| H | -7.35132500 | -1.24446000 | -0.17858200 |
| H | -6.04844400 | -0.06785500 | 0.03791000  |
| C | -2.12510000 | -5.65756400 | -0.52350600 |
| H | -1.97915200 | -4.96410200 | 0.31164600  |
| C | -0.87253000 | -6.55424700 | -0.57639300 |
| H | -0.71443400 | -7.03797900 | 0.39459200  |
| H | -0.97592300 | -7.34816000 | -1.32464800 |
| H | 0.02374300  | -5.97697300 | -0.81916300 |
| C | -3.38000300 | -6.49727500 | -0.20704400 |
| H | -3.60992500 | -7.18484000 | -1.02866600 |

|   |             |             |             |
|---|-------------|-------------|-------------|
| H | -3.22642900 | -7.10219300 | 0.69372400  |
| H | -4.25726600 | -5.86306600 | -0.04376700 |

### 3cis-3

|    |             |             |             |
|----|-------------|-------------|-------------|
| C  | -1.81334300 | 4.17066800  | -2.70914100 |
| C  | -1.47353600 | 5.34157200  | -1.92287800 |
| C  | -0.14362500 | 5.76664000  | -1.84427700 |
| C  | 0.89435700  | 5.03923300  | -2.54876900 |
| C  | 0.56608200  | 3.91165500  | -3.30810100 |
| C  | -0.81632100 | 3.47085600  | -3.38833200 |
| C  | -2.85647800 | 3.44473100  | -1.99786800 |
| C  | -3.16058200 | 4.16129800  | -0.78570500 |
| C  | -2.30633900 | 5.33560200  | -0.73074600 |
| C  | -1.77858200 | 5.76103300  | 0.48943300  |
| C  | 0.40206200  | 6.21186900  | -0.57126100 |
| C  | 2.07936600  | 5.02582700  | -1.70831600 |
| C  | 2.88149700  | 3.88457700  | -1.65062200 |
| C  | 2.53487800  | 2.71100900  | -2.42696200 |
| C  | 1.40586300  | 2.72953700  | -3.25229300 |
| C  | 0.54784200  | 1.56967300  | -3.29050100 |
| C  | -0.81727100 | 2.01671900  | -3.38130900 |
| C  | -1.80560100 | 1.31975000  | -2.68050500 |
| C  | -2.84852100 | 2.04471700  | -1.98407300 |
| C  | -3.43377600 | 3.43855900  | 0.38270600  |
| C  | -3.44776000 | 1.99375600  | 0.37367700  |
| C  | -3.18617500 | 1.30247000  | -0.79557400 |
| C  | -2.51779200 | -0.04238700 | -0.83841700 |
| C  | -1.50277800 | 0.13042600  | -1.92432600 |
| C  | -0.18325700 | -0.28435900 | -1.81875500 |
| C  | 0.85350000  | 0.45067400  | -2.50134200 |
| C  | 1.77843300  | 5.76106700  | -0.48949100 |
| C  | 1.81322700  | 4.17072500  | 2.70909500  |
| C  | 0.81622000  | 3.47089700  | 3.38829100  |
| C  | 1.50274700  | 0.13047000  | 1.92431000  |
| C  | 2.51776200  | -0.04232800 | 0.83840100  |
| C  | 1.47339600  | 5.34161600  | 1.92282300  |
| C  | 0.14347600  | 5.76665600  | 1.84422000  |
| C  | -0.89449100 | 5.03923300  | 2.54871700  |
| C  | -0.56619300 | 3.91166700  | 3.30805700  |
| C  | -1.40594900 | 2.72953100  | 3.25225700  |
| C  | -0.54790300 | 1.56968500  | 3.29047300  |
| C  | -0.85353700 | 0.45067300  | 2.50132200  |
| C  | 0.18323400  | -0.28434400 | 1.81874100  |
| C  | 1.87479500  | -0.55487300 | -0.57340100 |
| C  | 0.38525700  | -0.81112500 | -0.56449100 |
| C  | -0.38526800 | -0.81113000 | 0.56448000  |
| C  | -1.87481100 | -0.55490800 | 0.57338700  |
| C  | -2.04922700 | 0.41963100  | 1.69844800  |
| C  | -2.86811500 | 1.53426500  | 1.65205100  |
| C  | -2.53496300 | 2.71097300  | 2.42692600  |
| C  | -2.88160600 | 3.88452800  | 1.65057800  |
| C  | -2.07950000 | 5.02579600  | 1.70826400  |
| C  | 2.30619800  | 5.33565500  | 0.73069200  |
| C  | -0.40222000 | 6.21186500  | 0.57120100  |
| Si | -3.28216100 | -1.63884600 | -0.13670700 |
| C  | 3.43367500  | 3.43862800  | -0.38274700 |
| C  | 3.16046700  | 4.16137000  | 0.78565900  |
| C  | 2.84844900  | 2.04479100  | 1.98404200  |
| C  | 2.85637700  | 3.44480500  | 1.99782800  |
| C  | 1.80554400  | 1.31980600  | 2.68048000  |
| C  | 0.81720000  | 2.01675900  | 3.38127900  |
| C  | 3.44769000  | 1.99382600  | -0.37370800 |
| C  | 3.18611800  | 1.30254300  | 0.79554900  |
| C  | 2.04919100  | 0.41966100  | -1.69847000 |
| C  | 2.86805600  | 1.53431300  | -1.65208000 |
| Si | 3.28217200  | -1.63877000 | 0.13670600  |
| C  | 2.86966700  | -3.29984700 | 1.02188200  |
| C  | 2.63779500  | -4.44771500 | 0.20463800  |
| C  | 2.79689500  | -3.46260800 | 2.44275900  |
| C  | 2.34115600  | -5.68413300 | 0.78889600  |

|   |             |             |             |
|---|-------------|-------------|-------------|
| C | 2.51180300  | -4.72962900 | 2.97405200  |
| C | 2.28352000  | -5.83329600 | 2.16711300  |
| H | 2.15478100  | -6.54434600 | 0.15454800  |
| H | 2.46660500  | -4.84890900 | 4.05207500  |
| H | 2.06270800  | -6.80189600 | 2.60877600  |
| C | 4.97802300  | -1.29368900 | -0.71112500 |
| C | 6.08635000  | -1.02329400 | 0.14330400  |
| C | 5.16687300  | -1.13239500 | -2.12120100 |
| C | 7.28461000  | -0.52679900 | -0.38376900 |
| C | 6.38696700  | -0.63253100 | -2.59721800 |
| C | 7.43311100  | -0.30860300 | -1.74480800 |
| H | 8.11314200  | -0.31295300 | 0.28512700  |
| H | 6.52177200  | -0.50326300 | -3.66631900 |
| H | 8.36319800  | 0.08950100  | -2.14235600 |
| C | -2.86961100 | -3.29992200 | -1.02187000 |
| C | -2.63755000 | -4.44774100 | -0.20460900 |
| C | -2.79690900 | -3.46272000 | -2.44274800 |
| C | -2.34081600 | -5.68414400 | -0.78884900 |
| C | -2.51172100 | -4.72972800 | -2.97402100 |
| C | -2.28326500 | -5.83334700 | -2.16706400 |
| H | -2.15429800 | -6.54431500 | -0.15448500 |
| H | -2.46658100 | -4.84903600 | -4.05204300 |
| H | -2.06237900 | -6.80193700 | -2.60871300 |
| C | -4.97800700 | -1.29381100 | 0.71116300  |
| C | -6.08638100 | -1.02350800 | -0.14323800 |
| C | -5.16682700 | -1.13249100 | 2.12124200  |
| C | -7.28465300 | -0.52706900 | 0.38386000  |
| C | -6.38693700 | -0.63268700 | 2.59728200  |
| C | -7.43312500 | -0.30884300 | 1.74489600  |
| H | -8.11322000 | -0.31329800 | -0.28501600 |
| H | -6.52171600 | -0.50339800 | 3.66638500  |
| H | -8.36322500 | 0.08921500  | 2.14246200  |
| C | 3.00629400  | -2.36652200 | 3.49319800  |
| H | 3.21378000  | -1.42321000 | 2.98557100  |
| C | 4.20173200  | -2.67437400 | 4.42010400  |
| H | 4.39433800  | -1.82127200 | 5.08137400  |
| H | 3.99780300  | -3.54234900 | 5.05717600  |
| H | 5.11449000  | -2.88750500 | 3.85992100  |
| C | 1.74613600  | -2.15973500 | 4.36170000  |
| H | 1.87100900  | -1.27857400 | 5.00162500  |
| H | 0.85141700  | -2.01200200 | 3.75379900  |
| H | 1.57291900  | -3.02149900 | 5.01664200  |
| C | 2.66136200  | -4.39683800 | -1.31957000 |
| H | 3.18698500  | -3.48293100 | -1.61456800 |
| C | 1.23691600  | -4.31576400 | -1.89973900 |
| H | 0.68386300  | -3.46229100 | -1.49684900 |
| H | 1.27116700  | -4.21801600 | -2.99161100 |
| H | 0.66619700  | -5.21984300 | -1.66183200 |
| C | 3.43166800  | -5.57423300 | -1.94767800 |
| H | 3.50101700  | -5.44389300 | -3.03189300 |
| H | 4.44769300  | -5.65347800 | -1.54539500 |
| H | 2.92673900  | -6.53036800 | -1.77410300 |
| C | 4.17918900  | -1.57349200 | -3.20538800 |
| H | 3.20926100  | -1.77085300 | -2.74046300 |
| C | 3.94958800  | -0.53576400 | -4.32454800 |
| H | 4.82370600  | -0.45189500 | -4.98018500 |
| H | 3.10798500  | -0.85077100 | -4.95196400 |
| H | 3.72778100  | 0.45728800  | -3.93124900 |
| C | 4.68704600  | -2.88277200 | -3.85068800 |
| H | 4.92648600  | -3.64377900 | -3.10475200 |
| H | 3.93706300  | -3.29223300 | -4.53861900 |
| H | 5.59957200  | -2.69294300 | -4.42744200 |
| C | 6.07531400  | -1.30477700 | 1.64227400  |
| H | 5.08044600  | -1.67119200 | 1.91446000  |
| C | 7.07744200  | -2.42956700 | 1.97764000  |
| H | 7.07667100  | -2.64750500 | 3.05134000  |
| H | 6.83314600  | -3.35192100 | 1.43957400  |
| H | 8.09851500  | -2.14324700 | 1.70250600  |
| C | 6.34482400  | -0.05050500 | 2.49414800  |
| H | 5.63296700  | 0.74825900  | 2.26525700  |

|   |             |             |             |
|---|-------------|-------------|-------------|
| H | 6.26095000  | -0.28974300 | 3.56062900  |
| H | 7.35412800  | 0.34111200  | 2.32370400  |
| C | -3.00647200 | -2.36669200 | -3.49321600 |
| H | -3.21412200 | -1.42340200 | -2.98561600 |
| C | -4.20183900 | -2.67476600 | -4.42014000 |
| H | -3.99774700 | -3.54271900 | -5.05719200 |
| H | -5.11457100 | -2.88804400 | -3.85997200 |
| H | -4.39457700 | -1.82171000 | -5.08142900 |
| C | -1.74633300 | -2.15972100 | -4.36170200 |
| H | -1.87134000 | -1.27859700 | -5.00165200 |
| H | -0.85164900 | -2.01182500 | -3.75379000 |
| H | -1.57296400 | -3.02147400 | -5.01661800 |
| C | -2.66098400 | -4.39683400 | 1.31959700  |
| H | -3.18678800 | -3.48304400 | 1.61463400  |
| C | -1.23649900 | -4.31542300 | 1.89962700  |
| H | -1.27066800 | -4.21768300 | 2.99150200  |
| H | -0.66558800 | -5.21936500 | 1.66166400  |
| H | -0.68368900 | -3.46181700 | 1.49668400  |
| C | -3.43094900 | -5.57440900 | 1.94778400  |
| H | -3.50015900 | -5.44412500 | 3.03201400  |
| H | -4.44701800 | -5.65385400 | 1.54565100  |
| H | -2.92584400 | -6.53043200 | 1.77409500  |
| C | -4.17909200 | -1.57349600 | 3.20541800  |
| H | -3.20911400 | -1.77064200 | 2.74050400  |
| C | -4.68672900 | -2.88292100 | 3.85059400  |
| H | -3.93667900 | -3.29231800 | 4.53849000  |
| H | -5.59929000 | -2.69330200 | 4.42735900  |
| H | -4.92603400 | -3.64389800 | 3.10458400  |
| C | -3.94972200 | -0.53582300 | 4.32467600  |
| H | -3.10807600 | -0.85072200 | 4.95208900  |
| H | -3.72809800 | 0.45730700  | 3.93147400  |
| H | -4.82387600 | -0.45218300 | 4.98029600  |
| C | -6.07539400 | -1.30505700 | -1.64219500 |
| H | -5.08052200 | -1.67143800 | -1.91440900 |
| C | -7.07748700 | -2.42990800 | -1.97746200 |
| H | -6.83311700 | -3.35222900 | -1.43937400 |
| H | -8.09855800 | -2.14362600 | -1.70228100 |
| H | -7.07676800 | -2.64788700 | -3.05115400 |
| C | -6.34500500 | -0.05083600 | -2.49411200 |
| H | -5.63317700 | 0.74797300  | -2.26528900 |
| H | -6.26116700 | -0.29011700 | -3.56058700 |
| H | -7.35432000 | 0.34073900  | -2.32363900 |

### 3e

|   |             |             |             |
|---|-------------|-------------|-------------|
| C | -0.47229100 | 2.91732300  | -3.47639700 |
| C | -0.20874800 | 4.27179100  | -3.01956000 |
| C | 1.06320700  | 4.61479200  | -2.55445000 |
| C | 2.12027000  | 3.61943300  | -2.52940000 |
| C | 1.86052600  | 2.30902200  | -2.95336600 |
| C | 0.53875800  | 1.95908300  | -3.43701500 |
| C | -1.82491300 | 2.56505000  | -3.06958900 |
| C | -2.38683100 | 3.68353900  | -2.35805700 |
| C | -1.39098000 | 4.74162100  | -2.32094600 |
| C | -1.25583700 | 5.53671400  | -1.17900200 |
| C | 1.20131600  | 5.44558300  | -1.36965300 |
| C | 2.90242600  | 3.82973000  | -1.33797100 |
| C | 3.38797300  | 2.72280000  | -0.63088700 |
| C | 3.15678100  | 1.37983100  | -1.09234800 |
| C | 2.39021100  | 1.17432800  | -2.22775000 |
| C | 1.37735000  | 0.10220800  | -2.26936000 |
| C | 0.25033400  | 0.60222800  | -3.00359500 |
| C | -1.05459700 | 0.26584700  | -2.60912400 |
| C | -2.10452200 | 1.26323600  | -2.63838000 |
| C | -3.19959000 | 3.44546800  | -1.24113000 |
| C | -3.50573500 | 2.09542100  | -0.82406900 |
| C | -2.98555700 | 1.01906300  | -1.52149600 |
| C | -2.62200200 | -0.29181400 | -0.88502800 |
| C | -1.27604000 | -0.58914500 | -1.48463400 |
| C | -0.17588000 | -1.03012000 | -0.75637100 |
| C | 1.16643700  | -0.71357400 | -1.16341600 |

|    |             |             |             |
|----|-------------|-------------|-------------|
| C  | 2.07516100  | -0.73455800 | 0.03310100  |
| C  | 3.19662000  | 0.43919700  | 0.07480000  |
| C  | 2.34400800  | 4.96069900  | -0.61542200 |
| C  | 0.93933300  | 4.58006500  | 2.64903200  |
| C  | -0.35359900 | 4.23021600  | 3.04619300  |
| C  | 0.11082500  | 0.56290500  | 2.99896600  |
| C  | 1.27197400  | 0.07925900  | 2.30928300  |
| C  | 1.13284600  | 5.42598400  | 1.48286200  |
| C  | 0.02801900  | 5.88432800  | 0.76053500  |
| C  | -1.31217500 | 5.51954300  | 1.17376800  |
| C  | -1.50081800 | 4.70863100  | 2.29651700  |
| C  | -2.49447500 | 3.64848000  | 2.26823700  |
| C  | -1.96594800 | 2.52106900  | 2.99003700  |
| C  | -2.22075800 | 1.22602200  | 2.52569200  |
| C  | -1.17310800 | 0.22656400  | 2.53971000  |
| C  | 1.11024000  | -0.71707600 | 1.18112000  |
| C  | -0.20814500 | -1.04150900 | 0.71319700  |
| C  | -1.34167700 | -0.61899300 | 1.39740400  |
| C  | -2.65372600 | -0.30865100 | 0.73281500  |
| C  | -3.03977900 | 0.99844700  | 1.36113000  |
| C  | -3.53161500 | 2.08282900  | 0.65533200  |
| C  | -3.25075100 | 3.42627500  | 1.10900800  |
| C  | -3.04957500 | 4.26897000  | -0.05517800 |
| C  | -2.10539900 | 5.29705900  | -0.02424500 |
| C  | 2.31097600  | 4.95111700  | 0.77892100  |
| C  | 0.06292400  | 5.89468500  | -0.69583400 |
| Si | -3.83923700 | -1.54098800 | -0.11109900 |
| C  | 3.35940000  | 2.71439800  | 0.81871300  |
| C  | 2.83736100  | 3.81236300  | 1.51430800  |
| C  | 1.72190500  | 2.27007200  | 3.05852500  |
| C  | 1.99864200  | 3.58641600  | 2.66410800  |
| C  | 0.37667000  | 1.91282900  | 3.46764200  |
| C  | -0.63662500 | 2.86936600  | 3.47017700  |
| C  | 3.11530100  | 1.36369500  | 1.25547900  |
| C  | 2.29155600  | 1.14556100  | 2.34707600  |
| Si | 3.89138200  | -1.33467900 | 0.08800900  |
| C  | 4.58692100  | -1.89777700 | -1.61675600 |
| C  | 4.16913200  | -3.16545200 | -2.11526700 |
| C  | 5.36237600  | -1.06103600 | -2.48176900 |
| C  | 4.42377600  | -3.52457900 | -3.44388700 |
| C  | 5.59829900  | -1.47227200 | -3.80105100 |
| C  | 5.11724500  | -2.67693900 | -4.29443000 |
| H  | 4.07636200  | -4.48531000 | -3.81269600 |
| H  | 6.18162400  | -0.83250500 | -4.45537200 |
| H  | 5.30220100  | -2.96088600 | -5.32728200 |
| C  | 4.44586900  | -1.92396600 | 1.83478700  |
| C  | 5.64205400  | -1.36825000 | 2.37604900  |
| C  | 3.65711300  | -2.76842300 | 2.67963000  |
| C  | 5.98004100  | -1.58588400 | 3.71695400  |
| C  | 4.04607300  | -2.96051700 | 4.01269800  |
| C  | 5.18220600  | -2.36472300 | 4.54125800  |
| H  | 6.88536000  | -1.13908400 | 4.11736500  |
| H  | 3.44214600  | -3.59820400 | 4.65040300  |
| H  | 5.45095700  | -2.52050900 | 5.58294600  |
| C  | -3.16403600 | -3.34371600 | -0.15794900 |
| C  | -2.54430500 | -3.92034300 | -1.31202500 |
| C  | -3.12676400 | -4.08241900 | 1.06003900  |
| C  | -1.86021400 | -5.13754200 | -1.18719900 |
| C  | -2.41858700 | -5.28835300 | 1.13480800  |
| C  | -1.77186700 | -5.81024700 | 0.02406200  |
| H  | -1.39355900 | -5.57235400 | -2.06520600 |
| H  | -2.38677400 | -5.83008500 | 2.07573200  |
| H  | -1.22531000 | -6.74753200 | 0.09354100  |
| C  | -5.67298300 | -0.94761500 | -0.09058800 |
| C  | -6.30747800 | -0.38973500 | 1.06575100  |
| C  | -6.38965100 | -0.91667200 | -1.32277300 |
| C  | -7.56305900 | 0.21923000  | 0.93359100  |
| C  | -7.63704600 | -0.28604300 | -1.40155800 |
| C  | -8.22055900 | 0.29408600  | -0.28588500 |
| H  | -8.03777800 | 0.64251600  | 1.81291200  |

|   |             |             |             |
|---|-------------|-------------|-------------|
| H | -8.15811100 | -0.25419300 | -2.35390000 |
| H | -9.18669800 | 0.78656200  | -0.36062100 |
| C | 3.47045800  | -4.20793900 | -1.25103300 |
| H | 3.41967800  | -3.81767000 | -0.23014600 |
| C | 6.07638900  | 0.22644000  | -2.06231700 |
| H | 5.67392000  | 0.55543100  | -1.10143900 |
| C | 4.29032700  | -5.51279200 | -1.18668200 |
| H | 3.80214500  | -6.24193700 | -0.53134600 |
| H | 4.38731300  | -5.97394200 | -2.17554800 |
| H | 5.30075100  | -5.32946400 | -0.80483900 |
| C | 2.02735800  | -4.48317100 | -1.70753400 |
| H | 1.53670400  | -5.19275700 | -1.03119400 |
| H | 1.43368500  | -3.56486300 | -1.72286800 |
| H | 2.00637800  | -4.91304900 | -2.71595100 |
| C | 7.58393800  | -0.05992200 | -1.88170200 |
| H | 8.04666200  | -0.29710300 | -2.84670600 |
| H | 8.09756800  | 0.81840300  | -1.47182100 |
| H | 7.76345800  | -0.90790400 | -1.21619000 |
| C | 5.90589400  | 1.39706900  | -3.05295500 |
| H | 4.86129000  | 1.55406700  | -3.32831000 |
| H | 6.28175500  | 2.32152400  | -2.60014600 |
| H | 6.47889200  | 1.23434700  | -3.97284300 |
| C | 6.63482000  | -0.55254200 | 1.55502600  |
| H | 6.26252300  | -0.50001600 | 0.52721100  |
| C | 2.43870400  | -3.58199000 | 2.23513800  |
| H | 2.12475800  | -3.23658200 | 1.24703900  |
| C | 1.21921900  | -3.44760700 | 3.17109400  |
| H | 0.98549500  | -2.40463500 | 3.39270400  |
| H | 0.34134900  | -3.90225300 | 2.69860600  |
| H | 1.38277800  | -3.96772000 | 4.12201900  |
| C | 2.81985800  | -5.07562300 | 2.12949500  |
| H | 1.99363300  | -5.65382400 | 1.69797800  |
| H | 3.71026500  | -5.23195100 | 1.51551600  |
| H | 3.03228100  | -5.48794700 | 3.12270100  |
| C | 8.00794000  | -1.25345200 | 1.50108500  |
| H | 7.92525000  | -2.26125000 | 1.07903900  |
| H | 8.70996300  | -0.67970500 | 0.88690800  |
| H | 8.44584400  | -1.34735500 | 2.50079400  |
| C | 6.77896500  | 0.89484600  | 2.06180400  |
| H | 7.45028600  | 1.46309300  | 1.40696800  |
| H | 5.81319600  | 1.40763000  | 2.09020500  |
| H | 7.20277200  | 0.92190200  | 3.07235300  |
| C | -3.87669600 | -3.65722500 | 2.31719200  |
| H | -4.41493600 | -2.73255800 | 2.08996000  |
| C | -2.65856600 | -3.37308700 | -2.73711900 |
| H | -3.03025100 | -2.34698100 | -2.68899300 |
| C | -5.77594000 | -0.47400000 | 2.49896300  |
| H | -4.72991600 | -0.78802900 | 2.46882200  |
| C | -5.88836200 | -1.57545400 | -2.60242500 |
| H | -4.94216800 | -2.07397900 | -2.37471800 |
| C | -3.67574900 | -4.22420500 | -3.52931300 |
| H | -4.63041900 | -4.31602600 | -3.00478200 |
| H | -3.86299900 | -3.78384800 | -4.51623000 |
| H | -3.28785800 | -5.23775400 | -3.68430900 |
| C | -1.32857300 | -3.32772200 | -3.51498100 |
| H | -1.47766200 | -2.80489800 | -4.46662000 |
| H | -0.54832000 | -2.80282800 | -2.96128900 |
| H | -0.96158900 | -4.33232100 | -3.75367200 |
| C | -6.86672100 | -2.66740800 | -3.08194100 |
| H | -6.47882400 | -3.16525200 | -3.97687400 |
| H | -7.02802400 | -3.42667900 | -2.30857400 |
| H | -7.84337900 | -2.24299200 | -3.33873500 |
| C | -5.61159700 | -0.55809500 | -3.72534600 |
| H | -4.90272400 | 0.21065300  | -3.40440900 |
| H | -5.19501800 | -1.06356000 | -4.60486200 |
| H | -6.53287400 | -0.05397900 | -4.03956900 |
| C | -6.57796200 | -1.53316400 | 3.28730100  |
| H | -6.14003500 | -1.68931300 | 4.28083000  |
| H | -7.61361400 | -1.20282500 | 3.42791600  |
| H | -6.61004800 | -2.49447000 | 2.76801300  |



|   |             |             |            |
|---|-------------|-------------|------------|
| C | -5.82433100 | 0.86433900  | 3.26610300 |
| H | -5.26703100 | 0.77245700  | 4.20521900 |
| H | -5.38776100 | 1.68297100  | 2.69077500 |
| H | -6.85139800 | 1.14318800  | 3.52745600 |
| C | -4.93717400 | -4.70968200 | 2.70190000 |
| H | -5.50228700 | -4.38294100 | 3.58121200 |
| H | -5.64434300 | -4.88119200 | 1.88276700 |
| H | -4.47333400 | -5.67144200 | 2.94708100 |
| C | -2.94246900 | -3.36145400 | 3.50482500 |
| H | -2.20089500 | -2.59826200 | 3.25127900 |
| H | -3.52120400 | -3.00459300 | 4.36512400 |
| H | -2.40377700 | -4.26222300 | 3.82141100 |

### 3trans-1

|   |             |             |             |
|---|-------------|-------------|-------------|
| C | 0.00032600  | 0.69674600  | -3.49563300 |
| C | 1.17271300  | 1.42779200  | -3.04418600 |
| C | 2.29741100  | 0.72737000  | -2.59017300 |
| C | 2.29395100  | -0.72147600 | -2.58545800 |
| C | 1.17180500  | -1.42480800 | -3.04085100 |
| C | -0.00032800 | -0.69692800 | -3.49561900 |
| C | -1.17181000 | 1.42464000  | -3.04089600 |
| C | -0.72608400 | 2.59067300  | -2.31824500 |
| C | 0.72578400  | 2.59338900  | -2.32065500 |
| C | 1.42894200  | 2.99683900  | -1.17899100 |
| C | 3.05429400  | 1.17876900  | -1.44830600 |
| C | 3.04344400  | -1.16781900 | -1.43932400 |
| C | 2.60444900  | -2.27740800 | -0.73554400 |
| C | 1.42791000  | -2.99219600 | -1.17473000 |
| C | 0.72607000  | -2.59082100 | -2.31816700 |
| C | -0.72579700 | -2.59353400 | -2.32059000 |
| C | -1.17272000 | -1.42796300 | -3.04416200 |
| C | -2.29742000 | -0.72752200 | -2.59017600 |
| C | -2.29396200 | 0.72132400  | -2.58549100 |
| C | -1.42793500 | 2.99208100  | -1.17482500 |
| C | -2.60447400 | 2.27730400  | -0.73562900 |
| C | -3.04347000 | 1.16770200  | -1.43938000 |
| C | -3.74306000 | -0.00336800 | -0.81344500 |
| C | -3.05430400 | -1.17889300 | -1.44831000 |
| C | -2.60948000 | -2.28551900 | -0.74370500 |
| C | -1.42896600 | -2.99695700 | -1.17892200 |
| C | -0.69745300 | -3.43103300 | -0.00105900 |
| C | 0.69750500  | -3.43101200 | 0.00109300  |
| C | 3.74303500  | 0.00324000  | -0.81341800 |
| C | 1.17272400  | -1.42784700 | 3.04413800  |
| C | 2.29740500  | -0.72739600 | 2.59013400  |
| C | 2.29391000  | 0.72145100  | 2.58541700  |
| C | 1.17174100  | 1.42475500  | 3.04079800  |
| C | -0.00037700 | 0.69684400  | 3.49555700  |
| C | -1.17179800 | -1.42475500 | 3.04082500  |
| C | -0.72603900 | -2.59077800 | 2.31817900  |
| C | 0.72582800  | -2.59345500 | 2.32060000  |
| C | 1.42900900  | -2.99688800 | 1.17894400  |
| C | 2.60950300  | -2.28543000 | 0.74370700  |
| C | 3.05431500  | -1.17878100 | 1.44827500  |
| C | 3.04339900  | 1.16780700  | 1.43928700  |
| C | 2.60438500  | 2.27739200  | 0.73550600  |
| C | 1.42782600  | 2.99214900  | 1.17468400  |
| C | 0.72598500  | 2.59075900  | 2.31811700  |
| C | -0.72588200 | 2.59343500  | 2.32052600  |
| C | -1.17278400 | 1.42785100  | 3.04409300  |
| C | -2.29746200 | 0.72738300  | 2.59009500  |
| C | -2.29396600 | -0.72146400 | 2.58541900  |
| C | -1.42787100 | -2.99220300 | 1.17475300  |
| C | -2.60442900 | -2.27746100 | 0.73554800  |
| C | -3.04344000 | -1.16785400 | 1.43929600  |
| C | -3.74305200 | 0.00316800  | 0.81335200  |
| C | -3.05434800 | 1.17873800  | 1.44821800  |
| C | -2.60954100 | 2.28537200  | 0.74362500  |
| C | -1.42905300 | 2.99684200  | 1.17885300  |
| C | -0.69753900 | 3.43093200  | 0.00099400  |

|    |             |             |             |
|----|-------------|-------------|-------------|
| C  | 0.69741900  | 3.43094800  | -0.00114600 |
| C  | 3.74302100  | -0.00323300 | 0.81339200  |
| C  | 2.60945000  | 2.28541100  | -0.74374200 |
| C  | 0.00031500  | -0.69683000 | 3.49557300  |
| Si | -5.46690200 | -0.00003100 | -0.00003000 |
| Si | 5.46690300  | 0.00001500  | 0.00000300  |
| C  | 6.30622300  | -1.73316600 | -0.01829600 |
| C  | 6.80632300  | -2.24888400 | 1.21315900  |
| C  | 6.31758000  | -2.59736300 | -1.15963400 |
| C  | 7.21705700  | -3.58388800 | 1.30725300  |
| C  | 6.74920100  | -3.92290400 | -1.01270300 |
| C  | 7.17729400  | -4.42675300 | 0.20717100  |
| H  | 7.57628400  | -3.96465300 | 2.25883800  |
| H  | 6.75281500  | -4.57451700 | -1.88056600 |
| H  | 7.49238500  | -5.46347100 | 0.29393000  |
| C  | 6.30653800  | 1.73302100  | 0.01832800  |
| C  | 6.80680100  | 2.24864300  | -1.21311400 |
| C  | 6.31812100  | 2.59716500  | 1.15969300  |
| C  | 7.21801500  | 3.58349700  | -1.30711000 |
| C  | 6.75029400  | 3.92254700  | 1.01286600  |
| C  | 7.17860500  | 4.42630200  | -0.20696300 |
| H  | 7.57735900  | 3.96420800  | -2.25867400 |
| H  | 6.75416700  | 4.57408900  | 1.88077900  |
| H  | 7.49412100  | 5.46289500  | -0.29366200 |
| C  | -6.30661300 | -1.73298900 | 0.01834400  |
| C  | -6.80699600 | -2.24863800 | -1.21302900 |
| C  | -6.31804800 | -2.59711600 | 1.15972700  |
| C  | -7.21811600 | -3.58351700 | -1.30699400 |
| C  | -6.75003800 | -3.92256200 | 1.01292000  |
| C  | -7.17843200 | -4.42634400 | -0.20686900 |
| H  | -7.57759300 | -3.96423500 | -2.25850500 |
| H  | -6.75370300 | -4.57412600 | 1.88081800  |
| H  | -7.49382400 | -5.46297600 | -0.29355800 |
| C  | -6.30600900 | 1.73323200  | -0.01833900 |
| C  | -6.80593300 | 2.24905100  | 1.21313200  |
| C  | -6.31703900 | 2.59748900  | -1.15963300 |
| C  | -7.21611700 | 3.58420800  | 1.30733500  |
| C  | -6.74807500 | 3.92321300  | -1.01259900 |
| C  | -7.17594400 | 4.42715000  | 0.20732000  |
| H  | -7.57523000 | 3.96502900  | 2.25894400  |
| H  | -6.75144700 | 4.57488100  | -1.88042100 |
| H  | -7.49055900 | 5.46400400  | 0.29417200  |
| C  | 5.98134100  | -2.17878600 | -2.59320100 |
| H  | 5.48451600  | -1.20598900 | -2.56853500 |
| C  | 7.28492300  | -2.03664500 | -3.40970800 |
| H  | 7.76093200  | -3.01481100 | -3.54443900 |
| H  | 7.07478200  | -1.62793900 | -4.40572600 |
| H  | 8.01020500  | -1.38602700 | -2.91459400 |
| C  | 5.03432300  | -3.15192200 | -3.32651000 |
| H  | 4.15193200  | -3.39307300 | -2.73065800 |
| H  | 4.69788000  | -2.70149300 | -4.26724700 |
| H  | 5.53852500  | -4.09081400 | -3.58186300 |
| C  | 6.96193600  | -1.40650200 | 2.47413800  |
| H  | 6.65345100  | -0.38399000 | 2.23732800  |
| C  | 8.43929200  | -1.33954600 | 2.91289900  |
| H  | 8.54959300  | -0.70494100 | 3.79852300  |
| H  | 8.82410900  | -2.33249000 | 3.16971900  |
| H  | 9.07374600  | -0.93335200 | 2.11726900  |
| C  | 6.06935100  | -1.89629400 | 3.62995700  |
| H  | 6.16398100  | -1.22867200 | 4.49470800  |
| H  | 5.01602700  | -1.92960500 | 3.33669900  |
| H  | 6.35834800  | -2.90214800 | 3.95602400  |
| C  | 5.98150900  | 2.17869800  | 2.59321800  |
| H  | 5.48463300  | 1.20593200  | 2.56849200  |
| C  | 7.28482400  | 2.03653000  | 3.41014100  |
| H  | 7.07434000  | 1.62775100  | 4.40605600  |
| H  | 8.01028100  | 1.38595700  | 2.91522800  |
| H  | 7.76079100  | 3.01468300  | 3.54511900  |
| C  | 5.03433100  | 3.15196900  | 3.32615700  |
| H  | 4.15212600  | 3.39309700  | 2.73002300  |

|   |             |             |             |
|---|-------------|-------------|-------------|
| H | 4.69758500  | 2.70167600  | 4.26685200  |
| H | 5.53852200  | 4.09085800  | 3.58153200  |
| C | 6.96207000  | 1.40633800  | -2.47419300 |
| H | 6.65329600  | 0.38389000  | -2.23749000 |
| C | 8.43937000  | 1.33901100  | -2.91307600 |
| H | 9.07378200  | 0.93257100  | -2.11753300 |
| H | 8.54942300  | 0.70444700  | -3.79875900 |
| H | 8.82443800  | 2.33187200  | -3.16984900 |
| C | 6.06954800  | 1.89655600  | -3.62987700 |
| H | 6.16386200  | 1.22900600  | -4.49471700 |
| H | 5.01626300  | 1.93019200  | -3.33651100 |
| H | 6.35886100  | 2.90234700  | -3.95586000 |
| C | -6.96248700 | -1.40626800 | -2.47403000 |
| H | -6.65368100 | -0.38384400 | -2.23728500 |
| C | -5.98154300 | -2.17852800 | 2.59323800  |
| H | -5.48462100 | -1.20578900 | 2.56845700  |
| C | -6.07011500 | -1.89639700 | -3.62987100 |
| H | -6.16448900 | -1.22875800 | -4.49463900 |
| H | -5.01679600 | -1.93010500 | -3.33662000 |
| H | -6.35950200 | -2.90214400 | -3.95592200 |
| C | -8.43985200 | -1.33889900 | -2.91264700 |
| H | -8.55007600 | -0.70424400 | -3.79824300 |
| H | -8.82496400 | -2.33173600 | -3.16945100 |
| H | -9.07412300 | -0.93254000 | -2.11694800 |
| C | -7.28496600 | -2.03617400 | 3.40996500  |
| H | -7.76114000 | -3.01425000 | 3.54475800  |
| H | -7.07457700 | -1.62752900 | 4.40595500  |
| H | -8.01021200 | -1.38540200 | 2.91499300  |
| C | -5.03447500 | -3.15171400 | 3.32642900  |
| H | -4.15217800 | -3.39290200 | 2.73045100  |
| H | -4.69787100 | -2.70130000 | 4.26711700  |
| H | -5.53868300 | -4.09058000 | 3.58186000  |
| C | -5.98128600 | 2.17871000  | -2.59325700 |
| H | -5.48458400 | 1.20584800  | -2.56862700 |
| C | -6.96204600 | 1.40654300  | 2.47396500  |
| H | -6.65359900 | 0.38402000  | 2.23713700  |
| C | -7.28518700 | 2.03661600  | -3.40928800 |
| H | -7.07543800 | 1.62781800  | -4.40535300 |
| H | -8.01034800 | 1.38610400  | -2.91386000 |
| H | -7.76114400 | 3.01482300  | -3.54390400 |
| C | -5.03438100 | 3.15157900  | -3.32706800 |
| H | -4.15175000 | 3.39274000  | -2.73157200 |
| H | -4.69831400 | 2.70091300  | -4.26782600 |
| H | -5.53853900 | 4.09048400  | -3.58245700 |
| C | -8.43959600 | 1.33976300  | 2.91210300  |
| H | -9.07378500 | 0.93373900  | 2.11617300  |
| H | -8.55037500 | 0.70510100  | 3.79762900  |
| H | -8.82433500 | 2.33276800  | 3.16882700  |
| C | -6.06988100 | 1.89606000  | 3.63021000  |
| H | -6.16491100 | 1.22830700  | 4.49481500  |
| H | -5.01643400 | 1.92933100  | 3.33737800  |
| H | -6.35891400 | 2.90187800  | 3.95635600  |

### 3trans-2

|   |             |             |             |
|---|-------------|-------------|-------------|
| C | 0.74171900  | -3.69834700 | -2.09332700 |
| C | -0.25011500 | -4.30422400 | -1.21951800 |
| C | -1.57383200 | -3.86409300 | -1.26089900 |
| C | -1.96662800 | -2.81328500 | -2.18405500 |
| C | -1.01097500 | -2.24694700 | -3.03998400 |
| C | 0.36754900  | -2.69222100 | -2.98458200 |
| C | 1.97732100  | -3.58402000 | -1.34276400 |
| C | 1.76013200  | -4.12243900 | -0.02094400 |
| C | 0.38561400  | -4.57400000 | 0.06148000  |
| C | -0.33690000 | -4.40668600 | 1.24470000  |
| C | -2.32726400 | -3.69158000 | -0.03251500 |
| C | -2.96285400 | -1.99122700 | -1.53759100 |
| C | -2.97097500 | -0.62107200 | -1.74930700 |
| C | -1.95932200 | -0.03116800 | -2.58623900 |
| C | -1.00633300 | -0.81847500 | -3.24267500 |
| C | 0.37350200  | -0.37016600 | -3.32548500 |

|    |             |             |             |
|----|-------------|-------------|-------------|
| C  | 1.21965800  | -1.52411000 | -3.16132400 |
| C  | 2.40381400  | -1.40575400 | -2.42295000 |
| C  | 2.78574100  | -2.45034900 | -1.49711100 |
| C  | 2.36228000  | -3.49723000 | 1.07910000  |
| C  | 3.21368100  | -2.34181800 | 0.90098500  |
| C  | 3.43799400  | -1.83632600 | -0.36857500 |
| C  | 3.68643000  | -0.38628500 | -0.66563500 |
| C  | 2.82146700  | -0.13900600 | -1.86878100 |
| C  | 1.99473800  | 0.96260500  | -2.01161000 |
| C  | 0.75186100  | 0.84429900  | -2.74206100 |
| C  | -0.24420000 | 1.66544900  | -2.07635300 |
| C  | -1.57451200 | 1.23718100  | -2.00044700 |
| C  | -3.19647500 | -2.54552700 | -0.18765000 |
| C  | -2.00464300 | 1.46724100  | 1.64611500  |
| C  | -2.81468100 | 0.35801100  | 1.82282100  |
| C  | -2.39065400 | -0.68885700 | 2.71984600  |
| C  | -1.20826700 | -0.57700500 | 3.46177500  |
| C  | -0.37542100 | 0.58486800  | 3.28979600  |
| C  | 0.22319500  | 2.18636500  | 1.51163600  |
| C  | -0.39217300 | 2.45638700  | 0.23788900  |
| C  | -1.77278100 | 2.02644700  | 0.29592100  |
| C  | -2.36533900 | 1.44549900  | -0.81072700 |
| C  | -3.42678100 | 0.38507800  | -0.73333600 |
| C  | -3.68583900 | -0.22715800 | 0.75082100  |
| C  | -2.76788000 | -1.95931500 | 2.13885400  |
| C  | -1.94392400 | -3.07910300 | 2.31260400  |
| C  | -0.70702000 | -2.95868200 | 3.06145300  |
| C  | -0.34394700 | -1.73662700 | 3.62858700  |
| C  | 1.03002900  | -1.27853700 | 3.55701400  |
| C  | 1.01010800  | 0.14862000  | 3.34289400  |
| C  | 1.95812700  | 0.72717800  | 2.49073900  |
| C  | 1.55652000  | 1.76446700  | 1.56124700  |
| C  | 0.36741900  | 2.28844900  | -0.93091400 |
| C  | 1.74981200  | 1.86625500  | -0.86595200 |
| C  | 2.34225400  | 1.62557200  | 0.36101200  |
| C  | 3.42236100  | 0.61019200  | 0.59136300  |
| C  | 2.98549400  | -0.06386500 | 1.86167800  |
| C  | 2.98673700  | -1.43760600 | 2.04756800  |
| C  | 1.99504600  | -2.05395000 | 2.89871000  |
| C  | 1.61194800  | -3.32567100 | 2.30895000  |
| C  | 0.29351800  | -3.77556900 | 2.39492000  |
| C  | -3.43422000 | -1.70287900 | 0.88495100  |
| C  | -1.71785600 | -3.96948800 | 1.19839200  |
| C  | -0.76507500 | 1.57694000  | 2.38273200  |
| Si | 5.19187600  | 0.64822100  | -0.11804500 |
| Si | -5.19922100 | 0.59913000  | -0.06321800 |
| C  | 5.52141000  | 2.17791500  | -1.24100600 |
| C  | 6.06212600  | 1.95086800  | -2.54039400 |
| C  | 5.11382100  | 3.50957800  | -0.90890400 |
| C  | 6.11319100  | 2.98936900  | -3.47779500 |
| C  | 5.19631700  | 4.51529400  | -1.88188500 |
| C  | 5.67050300  | 4.26456600  | -3.16154600 |
| H  | 6.50997000  | 2.79254200  | -4.46942400 |
| H  | 4.88353100  | 5.52245100  | -1.62567300 |
| H  | 5.70905200  | 5.06155300  | -3.89974700 |
| C  | 6.45921000  | -0.35832200 | 0.92587900  |
| C  | 6.87449500  | 0.18149300  | 2.17824500  |
| C  | 6.88852100  | -1.68278500 | 0.59232200  |
| C  | 7.61164600  | -0.59920900 | 3.07653000  |
| C  | 7.63458300  | -2.41747800 | 1.52428100  |
| C  | 7.98078300  | -1.89842800 | 2.76361000  |
| H  | 7.90207600  | -0.17770300 | 4.03440300  |
| H  | 7.95519200  | -3.42198000 | 1.26739300  |
| H  | 8.54745900  | -2.49744100 | 3.47187700  |
| C  | -5.55190800 | 2.36582700  | 0.61821400  |
| C  | -5.52204400 | 2.70089100  | 2.00984200  |
| C  | -5.69794800 | 3.42912400  | -0.32020800 |
| C  | -5.56911800 | 4.04855500  | 2.39262100  |
| C  | -5.73095200 | 4.75904700  | 0.11568100  |
| C  | -5.65280000 | 5.07538200  | 1.46324200  |

|   |             |             |             |
|---|-------------|-------------|-------------|
| H | -5.54359100 | 4.29680500  | 3.44879800  |
| H | -5.82277500 | 5.55677800  | -0.61556500 |
| H | -5.67300000 | 6.11212600  | 1.78939100  |
| C | -6.44791200 | -0.65979600 | -0.81515200 |
| C | -7.25315000 | -1.42123500 | 0.08176500  |
| C | -6.50425600 | -0.98764100 | -2.20767200 |
| C | -8.00768100 | -2.50285600 | -0.38778200 |
| C | -7.28502300 | -2.07412100 | -2.62594900 |
| C | -8.01660000 | -2.84259300 | -1.73187500 |
| H | -8.59927600 | -3.08382400 | 0.31365900  |
| H | -7.32197400 | -2.31985300 | -3.68236600 |
| H | -8.60109800 | -3.68876300 | -2.08391600 |
| C | -5.85851100 | 3.20908400  | -1.82010000 |
| H | -5.86693300 | 2.13075500  | -2.00446200 |
| C | -5.53693900 | 1.69703600  | 3.16539000  |
| H | -5.31251300 | 0.70321900  | 2.77104200  |
| C | -5.84854400 | -0.18726400 | -3.33578300 |
| H | -5.12450000 | 0.50574300  | -2.90095000 |
| C | -7.38020700 | -1.10705300 | 1.56799600  |
| H | -6.78399000 | -0.21369200 | 1.77612000  |
| C | -5.08599800 | -1.05368300 | -4.36018600 |
| H | -4.49815700 | -0.40949600 | -5.02387900 |
| H | -4.40413600 | -1.75592800 | -3.87679700 |
| H | -5.77164100 | -1.62782100 | -4.99364300 |
| C | -6.92388300 | 0.63699600  | -4.07764800 |
| H | -7.52215600 | 1.24246000  | -3.39212100 |
| H | -6.45993300 | 1.30340600  | -4.81515300 |
| H | -7.61202000 | -0.02639900 | -4.61422700 |
| C | -7.21085800 | 3.76049900  | -2.31665100 |
| H | -7.33475700 | 3.56930500  | -3.38775800 |
| H | -8.04992900 | 3.29783600  | -1.78518300 |
| H | -7.27924600 | 4.84333900  | -2.16578700 |
| C | -4.69335600 | 3.80214800  | -2.63450700 |
| H | -3.72957100 | 3.40652100  | -2.30115500 |
| H | -4.81220800 | 3.56618000  | -3.69876600 |
| H | -4.65835600 | 4.89370600  | -2.53997000 |
| C | -4.49748000 | 1.99157900  | 4.26742800  |
| H | -4.44389700 | 1.14437000  | 4.96056400  |
| H | -3.49985500 | 2.15805200  | 3.85660200  |
| H | -4.77322900 | 2.87289100  | 4.85751300  |
| C | -6.94445600 | 1.65990400  | 3.80074800  |
| H | -7.00766700 | 0.86539600  | 4.55438400  |
| H | -7.16462400 | 2.61077800  | 4.29967700  |
| H | -7.72662500 | 1.49336900  | 3.05582500  |
| C | -6.83743900 | -2.23724200 | 2.46275700  |
| H | -5.79669100 | -2.47381900 | 2.22307800  |
| H | -6.88903400 | -1.94636900 | 3.51878000  |
| H | -7.42543300 | -3.15468600 | 2.34374500  |
| C | -8.83937200 | -0.76893900 | 1.93683200  |
| H | -8.91832300 | -0.51032500 | 2.99799100  |
| H | -9.21444600 | 0.07549000  | 1.34792200  |
| H | -9.50376800 | -1.62080900 | 1.75566300  |
| C | 4.66766100  | 3.98193000  | 0.47720300  |
| H | 4.45959400  | 3.10667500  | 1.09715300  |
| C | 6.64000100  | 0.61260200  | -2.98649300 |
| H | 6.58283400  | -0.07874200 | -2.14049600 |
| C | 8.13202100  | 0.75122100  | -3.35274600 |
| H | 8.55002200  | -0.21946500 | -3.63946300 |
| H | 8.27313400  | 1.43280300  | -4.19860200 |
| H | 8.71470200  | 1.14180800  | -2.51101000 |
| C | 5.84761800  | -0.01899400 | -4.14656300 |
| H | 6.25576100  | -1.00595600 | -4.39507000 |
| H | 4.79075100  | -0.13980100 | -3.89132500 |
| H | 5.90545600  | 0.59946800  | -5.04976100 |
| C | 5.80664300  | 4.78698600  | 1.14116800  |
| H | 5.97404600  | 5.72781400  | 0.60416800  |
| H | 5.55050200  | 5.03594500  | 2.17831000  |
| H | 6.75173400  | 4.23819900  | 1.14032500  |
| C | 3.38688700  | 4.84289400  | 0.46567500  |
| H | 2.58446800  | 4.37690000  | -0.10937300 |

|   |            |             |             |
|---|------------|-------------|-------------|
| H | 3.03082400 | 4.98886700  | 1.49185300  |
| H | 3.57287700 | 5.83771500  | 0.04533600  |
| C | 6.58863700 | 1.61522300  | 2.61020700  |
| H | 6.05807500 | 2.11452200  | 1.79398400  |
| C | 6.68667700 | -2.36690000 | -0.76216700 |
| H | 5.94837500 | -1.80126600 | -1.33550300 |
| C | 5.68569900 | 1.69128300  | 3.85575900  |
| H | 5.45362900 | 2.73577000  | 4.09592300  |
| H | 4.74326500 | 1.15785900  | 3.70102700  |
| H | 6.17902800 | 1.25283200  | 4.73095700  |
| C | 7.90072900 | 2.39442700  | 2.83563800  |
| H | 8.52222100 | 2.39867100  | 1.93324800  |
| H | 7.68943500 | 3.43257300  | 3.11279800  |
| H | 8.49285500 | 1.95218700  | 3.64418200  |
| C | 6.16826700 | -3.81709300 | -0.66288600 |
| H | 5.29943100 | -3.89840400 | -0.00698100 |
| H | 5.87936200 | -4.17500600 | -1.65763000 |
| H | 6.94126100 | -4.49760200 | -0.28828300 |
| C | 8.01718500 | -2.36297000 | -1.54702200 |
| H | 7.86718800 | -2.74442100 | -2.56448800 |
| H | 8.45177600 | -1.36237900 | -1.61306200 |
| H | 8.75404000 | -3.00797500 | -1.05453800 |

### 3trans-3

|   |             |             |             |
|---|-------------|-------------|-------------|
| C | -1.70335400 | -4.80556900 | -0.04952200 |
| C | -0.61227900 | -5.12955800 | -0.95013900 |
| C | 0.69729500  | -5.18445800 | -0.46671100 |
| C | 0.96708500  | -4.91512200 | 0.93806700  |
| C | -0.08598200 | -4.60402200 | 1.80115600  |
| C | -1.44377800 | -4.54974100 | 1.29742800  |
| C | -2.65081700 | -3.97807600 | -0.77997500 |
| C | -2.15154700 | -3.79057400 | -2.11884900 |
| C | -0.88973600 | -4.49789100 | -2.23173100 |
| C | 0.15666700  | -3.94851100 | -2.97653100 |
| C | 1.78065200  | -4.61231900 | -1.24495000 |
| C | 2.21498500  | -4.17999800 | 1.02158300  |
| C | 2.35759100  | -3.14361700 | 1.95577500  |
| C | 1.26398200  | -2.82332300 | 2.84947200  |
| C | 0.06720900  | -3.53854100 | 2.78201600  |
| C | -1.20158800 | -2.84155900 | 2.89234700  |
| C | -2.12443300 | -3.45453000 | 1.97507400  |
| C | -3.02714400 | -2.65182500 | 1.26636700  |
| C | -3.29518600 | -2.91707300 | -0.13165400 |
| C | -2.31557200 | -2.54464800 | -2.74110900 |
| C | -3.01256400 | -1.46672700 | -2.06968100 |
| C | -3.51762200 | -1.65454000 | -0.79429700 |
| C | -3.61489300 | -0.56491700 | 0.23649300  |
| C | -3.07973600 | -1.22715800 | 1.47265400  |
| C | -2.18213100 | -0.63459300 | 2.34571000  |
| C | -1.22371600 | -1.44957000 | 3.06065400  |
| C | 0.02154400  | -0.71383000 | 3.15179500  |
| C | 1.24751900  | -1.38250600 | 3.04390400  |
| C | 2.71349600  | -3.99303900 | -0.31714900 |
| C | 2.86097700  | 0.79657800  | 0.38295000  |
| C | 3.62180300  | -0.41803700 | -0.37924800 |
| C | 3.10820500  | -0.73162000 | -1.75701800 |
| C | 2.19381200  | 0.05524800  | -2.43718500 |
| C | 1.49897800  | 1.15659500  | -1.74042700 |
| C | 0.64543400  | 1.70294900  | 0.47860500  |
| C | 0.91247500  | 1.09220800  | 1.75344800  |
| C | 2.18659800  | 0.42177600  | 1.67355400  |
| C | 2.34251600  | -0.80617600 | 2.29458300  |
| C | 3.07111000  | -2.16259500 | -1.93622500 |
| C | 2.17753500  | -2.76131900 | -2.83402600 |
| C | 1.24133700  | -1.94011700 | -3.55423200 |
| C | 1.24244000  | -0.55410500 | -3.34238000 |
| C | -0.01642200 | 0.15452500  | -3.22612500 |
| C | 0.14227500  | 1.19479900  | -2.24257300 |
| C | -0.93013900 | 1.49882700  | -1.38977200 |
| C | -0.67261900 | 1.75969500  | 0.00090100  |

|    |             |             |             |
|----|-------------|-------------|-------------|
| C  | -0.15526200 | 0.55345000  | 2.48864800  |
| C  | -1.51281600 | 0.63293400  | 1.99040800  |
| C  | -1.77412900 | 1.24478100  | 0.77795200  |
| C  | -2.87322100 | 0.82421400  | -0.15596000 |
| C  | -2.18902300 | 0.80795500  | -1.49233900 |
| C  | -2.33152200 | -0.20667900 | -2.42430800 |
| C  | -1.23122300 | -0.53849900 | -3.30272000 |
| C  | -1.22620800 | -1.97685100 | -3.50904400 |
| C  | -0.01649000 | -2.66205200 | -3.63549300 |
| C  | 3.33594600  | -2.78566700 | -0.65633900 |
| C  | 1.51483100  | -4.00840400 | -2.47430900 |
| C  | 1.74854400  | 1.42088200  | -0.40582400 |
| Si | -4.74864000 | 0.96663400  | 0.16508400  |
| C  | 3.03009500  | -1.91168200 | 1.59969500  |
| C  | 3.52956300  | -1.74285800 | 0.31940300  |
| Si | 4.73237400  | 1.05244700  | 0.11184300  |
| C  | 5.12897700  | 2.23616200  | -1.35473600 |
| C  | 6.04491400  | 1.78474400  | -2.34952900 |
| C  | 4.44446000  | 3.47191300  | -1.58673300 |
| C  | 6.19999000  | 2.49669600  | -3.54492700 |
| C  | 4.64481500  | 4.15101500  | -2.79648400 |
| C  | 5.49558700  | 3.66736300  | -3.78014100 |
| H  | 6.88732300  | 2.12638000  | -4.29986600 |
| H  | 4.12181900  | 5.08638600  | -2.96805100 |
| H  | 5.61946900  | 4.20825900  | -4.71484300 |
| C  | 5.78704900  | 0.71148500  | 1.68660500  |
| C  | 5.73661500  | 1.66439900  | 2.74575800  |
| C  | 6.49283600  | -0.51203700 | 1.91997900  |
| C  | 6.29585000  | 1.36630200  | 3.99396900  |
| C  | 7.04391700  | -0.75569400 | 3.18564600  |
| C  | 6.93521000  | 0.15784800  | 4.22427400  |
| H  | 6.23019300  | 2.09677100  | 4.79500000  |
| H  | 7.57554900  | -1.68598900 | 3.35794300  |
| H  | 7.35991700  | -0.06531300 | 5.19966900  |
| C  | -5.78750700 | 1.07817800  | -1.45235900 |
| C  | -6.88122700 | 0.17693800  | -1.60695200 |
| C  | -5.43428900 | 1.90034200  | -2.56985900 |
| C  | -7.52832000 | 0.05368100  | -2.84215900 |
| C  | -6.12270300 | 1.74458700  | -3.78094200 |
| C  | -7.14646700 | 0.82034000  | -3.93238300 |
| H  | -8.34638100 | -0.65298500 | -2.94660900 |
| H  | -5.84938200 | 2.36861300  | -4.62575200 |
| H  | -7.65197800 | 0.71135600  | -4.88849400 |
| C  | -5.17523900 | 1.67422200  | 1.90462700  |
| C  | -5.54848600 | 0.86256400  | 3.02331700  |
| C  | -4.95887700 | 3.06474100  | 2.13256000  |
| C  | -5.62119300 | 1.44216300  | 4.29765200  |
| C  | -5.03533100 | 3.59063000  | 3.42762500  |
| C  | -5.35026800 | 2.78596200  | 4.51188600  |
| H  | -5.90202300 | 0.82180600  | 5.14268100  |
| H  | -4.84802000 | 4.64885900  | 3.58473300  |
| H  | -5.40055800 | 3.20412100  | 5.51399200  |
| C  | 3.55565300  | 4.19812000  | -0.57386400 |
| H  | 3.31725200  | 3.51116500  | 0.24146600  |
| C  | 4.32056300  | 5.40355900  | 0.01590500  |
| H  | 4.48890800  | 6.16461100  | -0.75483400 |
| H  | 3.74413500  | 5.86940300  | 0.82462600  |
| H  | 5.29859900  | 5.11579900  | 0.40961000  |
| C  | 2.21440200  | 4.69194800  | -1.15598200 |
| H  | 1.69109600  | 3.90545500  | -1.70312500 |
| H  | 1.56322400  | 5.03447800  | -0.34362200 |
| H  | 2.35667500  | 5.54096200  | -1.83420900 |
| C  | 6.92461500  | 0.55108200  | -2.18209500 |
| H  | 6.73548400  | 0.13389500  | -1.18850400 |
| C  | 8.41925700  | 0.92924900  | -2.23300900 |
| H  | 9.04575000  | 0.04471000  | -2.07736300 |
| H  | 8.68929400  | 1.35658300  | -3.20481800 |
| H  | 8.67030200  | 1.66842800  | -1.46414200 |
| C  | 6.60346400  | -0.55107700 | -3.20905100 |
| H  | 7.21195500  | -1.44247500 | -3.01529800 |

|   |             |             |             |
|---|-------------|-------------|-------------|
| H | 5.54937000  | -0.84094900 | -3.17022000 |
| H | 6.82172000  | -0.21769700 | -4.23022800 |
| C | 6.79588500  | -1.57775700 | 0.86374500  |
| H | 6.17518200  | -1.38853900 | -0.01525900 |
| C | 8.27837500  | -1.48033400 | 0.44078400  |
| H | 8.48702400  | -2.15792400 | -0.39620000 |
| H | 8.55413900  | -0.46587700 | 0.14195800  |
| H | 8.93321100  | -1.76610100 | 1.27208000  |
| C | 6.50009200  | -3.02066700 | 1.32428000  |
| H | 5.50315500  | -3.11647900 | 1.75857500  |
| H | 6.56642800  | -3.70243900 | 0.46882600  |
| H | 7.22854300  | -3.36491500 | 2.06709800  |
| C | 5.12104200  | 3.05118500  | 2.59816800  |
| H | 4.77647100  | 3.15934000  | 1.56541300  |
| C | 3.89801200  | 3.25835500  | 3.51127800  |
| H | 3.44906200  | 4.24241200  | 3.33057000  |
| H | 3.13351600  | 2.49574700  | 3.33657900  |
| H | 4.18062100  | 3.21352000  | 4.56944200  |
| C | 6.17633700  | 4.15056400  | 2.83734800  |
| H | 7.02233800  | 4.04828000  | 2.14859800  |
| H | 5.73666700  | 5.14367800  | 2.69714000  |
| H | 6.57237500  | 4.10733400  | 3.85775900  |
| C | -4.67023800 | 4.06258200  | 1.01669000  |
| H | -4.69527600 | 3.52231300  | 0.06563400  |
| C | -5.76706500 | 5.14495500  | 0.94738300  |
| H | -5.80493100 | 5.73381500  | 1.87029600  |
| H | -5.57231300 | 5.83851100  | 0.12260400  |
| H | -6.75708900 | 4.70042600  | 0.79665500  |
| C | -3.27529100 | 4.70388800  | 1.14050200  |
| H | -2.48708000 | 3.94586000  | 1.16950400  |
| H | -3.08299600 | 5.36708400  | 0.28860400  |
| H | -3.19525100 | 5.30596300  | 2.05307600  |
| C | -5.98009700 | -0.60447800 | 2.95162000  |
| H | -5.71224400 | -1.00261200 | 1.97002800  |
| C | -5.30823100 | -1.50950600 | 4.00577100  |
| H | -5.52418900 | -2.56033800 | 3.78183000  |
| H | -4.22420300 | -1.38223000 | 4.02538700  |
| H | -5.69182300 | -1.31001300 | 5.01274500  |
| C | -7.51344700 | -0.70145800 | 3.11227200  |
| H | -7.85486400 | -1.73089900 | 2.94839000  |
| H | -7.81162200 | -0.40888500 | 4.12569500  |
| H | -8.04161500 | -0.04647900 | 2.41482500  |
| C | -7.43709600 | -0.67016600 | -0.46801300 |
| H | -6.87391700 | -0.42837200 | 0.43838500  |
| C | -7.27435600 | -2.18135100 | -0.71763700 |
| H | -6.22895300 | -2.44773900 | -0.89874400 |
| H | -7.62884200 | -2.75194500 | 0.14907200  |
| H | -7.85787300 | -2.50493100 | -1.58734500 |
| C | -8.91205700 | -0.31628500 | -0.18743900 |
| H | -9.29549800 | -0.90276100 | 0.65408700  |
| H | -9.02867100 | 0.74654500  | 0.05207200  |
| H | -9.54556800 | -0.53246400 | -1.05452300 |
| C | -4.40689400 | 3.03503500  | -2.54810000 |
| H | -3.80709100 | 2.94945900  | -1.63893500 |
| C | -3.42640700 | 3.01729400  | -3.73969700 |
| H | -2.61900400 | 3.73741100  | -3.56443200 |
| H | -2.97777600 | 2.03305600  | -3.88685100 |
| H | -3.92024300 | 3.30876700  | -4.67357800 |
| C | -5.13848400 | 4.39524600  | -2.52075600 |
| H | -5.87728900 | 4.44781800  | -1.71712600 |
| H | -4.42326300 | 5.21654000  | -2.38933100 |
| H | -5.66939400 | 4.56360400  | -3.46487000 |

### 3trans-4

|   |             |            |            |
|---|-------------|------------|------------|
| C | 1.47933000  | 3.71026100 | 2.94631100 |
| C | 0.76159000  | 4.78430700 | 2.27967000 |
| C | -0.63532100 | 4.79905400 | 2.28832700 |
| C | -1.36746800 | 3.74044800 | 2.96387600 |
| C | -0.67635700 | 2.71155200 | 3.60433200 |
| C | 0.77520300  | 2.69595800 | 3.59572800 |



|    |             |             |             |
|----|-------------|-------------|-------------|
| C  | 2.64073200  | 3.38489400  | 2.13647900  |
| C  | 2.64817500  | 4.25011600  | 0.98228900  |
| C  | 1.48508300  | 5.11521900  | 1.06304800  |
| C  | 0.77985400  | 5.44654700  | -0.09637000 |
| C  | -1.36674200 | 5.14593900  | 1.08105600  |
| C  | -2.54695600 | 3.44107900  | 2.16958600  |
| C  | -2.98015300 | 2.11620100  | 2.03463900  |
| C  | -2.25681700 | 1.04942500  | 2.69038400  |
| C  | -1.13235800 | 1.33655900  | 3.47142500  |
| C  | 0.02459100  | 0.48084700  | 3.38528600  |
| C  | 1.20083300  | 1.31134100  | 3.45862700  |
| C  | 2.31040800  | 0.99897700  | 2.66564400  |
| C  | 3.04171300  | 2.05093100  | 1.99588100  |
| C  | 3.05866700  | 3.73640800  | -0.25379500 |
| C  | 3.50794900  | 2.36587500  | -0.37753200 |
| C  | 3.51585100  | 1.53864300  | 0.73134700  |
| C  | 3.27333400  | 0.05837100  | 0.67673800  |
| C  | 2.31830600  | -0.16691500 | 1.81287600  |
| C  | 1.17680600  | -0.94466600 | 1.72282600  |
| C  | 0.00813300  | -0.61557800 | 2.50930900  |
| C  | -1.17460100 | -0.91627000 | 1.73290400  |
| C  | -2.29693400 | -0.11278200 | 1.83535500  |
| C  | -2.54987000 | 4.30686900  | 1.01570900  |
| C  | -2.28560700 | 2.98086200  | -2.30363500 |
| C  | -1.16732300 | 2.68928500  | -3.09875300 |
| C  | -0.72194400 | -0.75614700 | -1.89331000 |
| C  | -1.45045100 | -1.13535800 | -0.72412700 |
| C  | -2.78686100 | -0.44391800 | -0.72521800 |
| C  | -3.26713800 | 0.12806800  | 0.71670500  |
| C  | -2.26309200 | 4.13710400  | -1.42806200 |
| C  | -1.13075400 | 4.95263400  | -1.37007900 |
| C  | 0.03420800  | 4.63610000  | -2.17622200 |
| C  | 0.01783700  | 3.52688400  | -3.02466700 |
| C  | 1.18483000  | 2.66559100  | -3.11576700 |
| C  | 0.72272200  | 1.30766800  | -3.23730000 |
| C  | 1.41195000  | 0.28608500  | -2.57881800 |
| C  | 0.68310700  | -0.76878200 | -1.90219200 |
| C  | -0.73343800 | -1.44012000 | 0.42683100  |
| C  | 0.70884000  | -1.45197800 | 0.41903100  |
| C  | 1.41627900  | -1.15621000 | -0.74028900 |
| C  | 2.76714100  | -0.49837600 | -0.76035500 |
| C  | 2.61159800  | 0.55304600  | -1.82299600 |
| C  | 3.04451800  | 1.86206800  | -1.68904600 |
| C  | 2.31967100  | 2.93345000  | -2.33636400 |
| C  | 2.32948400  | 4.08846800  | -1.45841400 |
| C  | 1.21536400  | 4.92789300  | -1.38519200 |
| C  | -2.98664100 | 3.80188400  | -0.21497700 |
| C  | -0.66864100 | 5.46205800  | -0.08714200 |
| Si | 4.40220300  | -1.24678400 | -0.13314000 |
| C  | -3.48318200 | 1.61368800  | 0.77658400  |
| C  | -3.46733200 | 2.44131700  | -0.33166000 |
| C  | -2.61506400 | 0.60852300  | -1.78237400 |
| C  | -3.02136500 | 1.92539300  | -1.64381300 |
| C  | -1.43653000 | 0.31536900  | -2.55841500 |
| C  | -0.73499500 | 1.32269200  | -3.22618000 |
| Si | -4.43269400 | -1.15419900 | -0.08030000 |
| C  | 4.29085100  | -3.02854400 | 0.59664400  |
| C  | 4.67728500  | -3.29456300 | 1.94833000  |
| C  | 3.86276800  | -4.13740600 | -0.20061600 |
| C  | 4.74173300  | -4.61604900 | 2.40955900  |
| C  | 3.94818600  | -5.43851000 | 0.31305300  |
| C  | 4.40798600  | -5.68858100 | 1.59691200  |
| H  | 5.04658900  | -4.80340100 | 3.43465400  |
| H  | 3.63137500  | -6.27201900 | -0.30640500 |
| H  | 4.47517100  | -6.70704400 | 1.97094100  |
| C  | 5.92391300  | -0.42539000 | -0.99231700 |
| C  | 6.79954400  | 0.44414600  | -0.27372400 |
| C  | 6.05981900  | -0.47598400 | -2.41215800 |
| C  | 7.65675500  | 1.30419300  | -0.97244300 |
| C  | 6.93241800  | 0.40429500  | -3.06451200 |

|   |             |             |             |
|---|-------------|-------------|-------------|
| C | 7.70654600  | 1.31331500  | -2.35871400 |
| H | 8.30669400  | 1.97126500  | -0.41445300 |
| H | 7.01257300  | 0.36556800  | -4.14672200 |
| H | 8.36650400  | 2.00011900  | -2.88242200 |
| C | -4.26143100 | -2.91445100 | 0.68285200  |
| C | -4.05824300 | -4.01078900 | -0.20558200 |
| C | -4.17402600 | -3.16768000 | 2.08916600  |
| C | -3.70838900 | -5.27128400 | 0.29284800  |
| C | -3.83086600 | -4.45158100 | 2.53531500  |
| C | -3.57954000 | -5.49427100 | 1.65514800  |
| H | -3.53842300 | -6.08969900 | -0.40062900 |
| H | -3.76353500 | -4.63742500 | 3.60244700  |
| H | -3.30141100 | -6.47581600 | 2.03045700  |
| C | -5.97858800 | -0.36362500 | -0.91284200 |
| C | -7.00466200 | 0.15057400  | -0.06733600 |
| C | -6.08556000 | -0.11969300 | -2.31954300 |
| C | -8.03381100 | 0.93622000  | -0.59966000 |
| C | -7.14243700 | 0.66493100  | -2.80154600 |
| C | -8.09999600 | 1.20886100  | -1.95742000 |
| H | -8.79558500 | 1.33629500  | 0.06304100  |
| H | -7.21707800 | 0.84950500  | -3.86839200 |
| H | -8.89980300 | 1.82610900  | -2.35852100 |
| C | -4.23258300 | -3.90941000 | -1.71663500 |
| H | -4.55631000 | -2.89113000 | -1.95172300 |
| C | -4.51699100 | -2.16650900 | 3.19543200  |
| H | -4.58944800 | -1.16845600 | 2.75681900  |
| C | -5.18410700 | -0.72843500 | -3.39673200 |
| H | -4.29978200 | -1.15382700 | -2.91632300 |
| C | -7.08014000 | -0.13482900 | 1.42823400  |
| H | -6.24899300 | -0.79725700 | 1.68788800  |
| C | -5.93842600 | -1.86673300 | -4.11894700 |
| H | -6.77660200 | -1.46298500 | -4.69855800 |
| H | -5.27271000 | -2.39069800 | -4.81581000 |
| H | -6.34881600 | -2.59701300 | -3.41702900 |
| C | -4.68471600 | 0.28637000  | -4.44667900 |
| H | -4.25980600 | 1.17959600  | -3.98479800 |
| H | -3.91048700 | -0.17674600 | -5.06894600 |
| H | -5.49079300 | 0.60218600  | -5.11858700 |
| C | -8.37996300 | -0.88751900 | 1.77981300  |
| H | -8.41375800 | -1.11921700 | 2.84959400  |
| H | -9.26479600 | -0.28570200 | 1.54566000  |
| H | -8.46023200 | -1.82687300 | 1.22146700  |
| C | -6.93532700 | 1.13749400  | 2.28416200  |
| H | -6.93191500 | 0.88202600  | 3.35053800  |
| H | -6.00755800 | 1.67061000  | 2.05660600  |
| H | -7.76902200 | 1.82823800  | 2.11268800  |
| C | -5.88669000 | -2.52528000 | 3.81302700  |
| H | -6.20308900 | -1.75426800 | 4.52621600  |
| H | -6.66411000 | -2.63323800 | 3.05255500  |
| H | -5.82527800 | -3.47583300 | 4.35547500  |
| C | -3.46444100 | -2.09095900 | 4.32153600  |
| H | -2.45273900 | -1.96831700 | 3.93014500  |
| H | -3.68291200 | -1.23869500 | 4.97500400  |
| H | -3.47916200 | -2.98935900 | 4.94893300  |
| C | -2.91968100 | -4.15843200 | -2.48269800 |
| H | -3.07231600 | -4.01356500 | -3.55894800 |
| H | -2.12948500 | -3.47734900 | -2.15351500 |
| H | -2.56254300 | -5.18424000 | -2.33452700 |
| C | -5.34369400 | -4.85934200 | -2.20889000 |
| H | -6.29811000 | -4.64721900 | -1.71428100 |
| H | -5.48651100 | -4.75759000 | -3.28983300 |
| H | -5.09125800 | -5.90611700 | -2.00757700 |
| C | 3.22982700  | -4.03299500 | -1.58938200 |
| H | 3.20166700  | -2.98154900 | -1.88380300 |
| C | 4.96893400  | -2.22598900 | 3.00203800  |
| H | 4.88215000  | -1.24296600 | 2.53373300  |
| C | 6.96764800  | 0.42862000  | 1.24254200  |
| H | 6.17822700  | -0.19487000 | 1.66795000  |
| C | 5.38656600  | -1.52178200 | -3.29455800 |
| H | 4.68830800  | -2.09003000 | -2.67598800 |

|   |            |             |             |
|---|------------|-------------|-------------|
| C | 6.45057600 | -2.51086700 | -3.81933700 |
| H | 5.98631600 | -3.29124300 | -4.43199600 |
| H | 7.18936500 | -1.99379600 | -4.44191700 |
| H | 6.99077500 | -2.99256800 | -2.99679300 |
| C | 4.58452600 | -0.93214300 | -4.46955600 |
| H | 4.06097600 | -1.73276500 | -5.00549100 |
| H | 3.84108100 | -0.20771600 | -4.12856700 |
| H | 5.23761300 | -0.43089300 | -5.19303200 |
| C | 8.32252600 | -0.22458000 | 1.59508800  |
| H | 9.15290300 | 0.37118100  | 1.19927600  |
| H | 8.44893400 | -0.29504800 | 2.68095700  |
| H | 8.40727600 | -1.23094200 | 1.17100600  |
| C | 6.86707900 | 1.81473500  | 1.90705100  |
| H | 5.94409400 | 2.33014600  | 1.63289700  |
| H | 6.88774200 | 1.70828300  | 2.99805600  |
| H | 7.70966000 | 2.45828700  | 1.62962200  |
| C | 6.38570000 | -2.35606700 | 3.59291400  |
| H | 7.15113200 | -2.39183200 | 2.81363200  |
| H | 6.60446800 | -1.50749500 | 4.25180200  |
| H | 6.48199800 | -3.26765900 | 4.19344700  |
| C | 3.92234000 | -2.26372700 | 4.13688200  |
| H | 4.08229400 | -1.42540600 | 4.82517600  |
| H | 2.90448300 | -2.19369200 | 3.74549300  |
| H | 3.99998900 | -3.19026400 | 4.71732200  |
| C | 4.02483200 | -4.81392500 | -2.65399700 |
| H | 3.62638800 | -4.60973800 | -3.65497900 |
| H | 5.08565400 | -4.55175100 | -2.64610100 |
| H | 3.95130800 | -5.89476800 | -2.48859000 |
| C | 1.76491300 | -4.52172900 | -1.57186200 |
| H | 1.17796000 | -4.00442700 | -0.80922000 |
| H | 1.29628600 | -4.33879900 | -2.54615000 |
| H | 1.70846400 | -5.59804100 | -1.37232600 |
